1 **Co-expression networks from gene expression variability between**  
2 **genetically identical seedlings can reveal novel regulatory**  
3 **relationships**

4  
5 **Short title: Co-expression networks from noisy gene expression**

6  
7 Cortijo S<sup>1,2</sup>, Bhattarai M<sup>1</sup>, Locke J C W<sup>1\*</sup>, Ahnert S E<sup>1,3\*</sup>

8 <sup>1</sup> The Sainsbury Laboratory, University of Cambridge, Bateman Street, Cambridge  
9 CB2 1LR, UK

10 <sup>2</sup> BPMP, Univ Montpellier, CNRS, INRAE, Institut Agro, Montpellier, France

11 <sup>3</sup> Theory of Condensed Matter, Cavendish Laboratory, University of Cambridge, JJ  
12 Thomson Avenue, Cambridge CB3 0HE, UK

13 \* Corresponding authors:

14 James Locke: Tel: +44 1223 761110; E-mail: james.locke@slcu.cam.ac.uk

15 Sebastian Ahnert: Tel: +44 1223 761148 ; E-mail: sebastian.ahnert@slcu.cam.ac.uk

16

17

18

19

20

21

22

23

24

25

## 26 **Abstract**

27 Co-expression networks are a powerful tool to understand gene regulation. They have  
28 been used to identify new regulation and function of genes involved in plant  
29 development and their response to the environment. Up to now, co-expression  
30 networks have been inferred using transcriptomes generated on plants experiencing  
31 genetic or environmental perturbation, or from expression time series. We propose a  
32 new approach by showing that co-expression networks can be constructed in the  
33 absence of genetic and environmental perturbation, for plants at the same  
34 developmental stage. For this we used transcriptomes that were generated from  
35 genetically identical individual plants that were grown in the same conditions and for  
36 the same amount of time. Twelve time points were used to cover the 24h light/dark  
37 cycle. We used variability in gene expression between individual plants of the same  
38 time point to infer a co-expression network. We show that this network is biologically  
39 relevant and use it to suggest new gene functions and to identify new targets for the  
40 transcription factors GI, PIF4 and PRR5. Moreover, we find different co-regulation in  
41 this network based on changes in expression between individual plants, compared to  
42 the usual approach requiring environmental perturbation. Our work shows that gene  
43 co-expression networks can be identified using variability in gene expression between  
44 individual plants, without the need for genetic or environmental perturbations. It will  
45 allow further exploration of gene regulation in contexts with subtle differences between  
46 plants, which could be closer to what individual plants in a population might face in the  
47 wild.

48

49

## 50 **Author summary**

51 Plant development and response to changes in the environment are strongly regulated  
52 at the level of gene expression. That is why understanding how gene expression is  
53 regulated is key, and transcriptome approaches have allowed the analysis of  
54 transcription for all genes of the genome. Extracting useful information from the high  
55 amount of data generated by transcriptomes is a challenge, and gene co-expression  
56 networks are a powerful tool to do this. The principle is to find genes that co-vary in  
57 expression in different conditions and to pair them together. Communities of genes  
58 that are more closely linked are then identified and this is the starting point to look for  
59 their implication in the same pathway. Co-expression networks have been used to  
60 identify new regulation and function of genes involved in plant development and their  
61 response to the environment. They were constructed using transcriptomes generated  
62 on plants experiencing genetic or environmental perturbation. We show that co-  
63 expression networks can in fact be constructed in the absence of genetic and  
64 environmental perturbation. Our work will allow further exploration of gene co-  
65 regulation in contexts with subtle differences between plants, which could be closer to  
66 what individual plants in a population might face in the wild.

67

## 68 **Introduction**

69 Understanding how transcriptomes are regulated is key to shedding light on how  
70 plants develop and also respond to environmental fluctuations. A powerful tool often  
71 used to reveal transcriptional regulation at a genome wide level is gene co-expression  
72 networks [1,2]. In gene co-expression networks, genes that co-vary in expression in  
73 different conditions are detected and paired together [3–5]. By doing this for the entire  
74 transcriptome, a multitude of genes can be linked, indicating a similar gene regulation.  
75 Communities of genes, called modules, that are more closely linked can then be

76 identified [6]. The presence of genes in a given module indicates a close co-regulation  
77 and is usually the starting point to look for their implication in the same pathway, or  
78 their regulation by the same transcription factor(s) [7–10]. Most studies using co-  
79 expression networks can be separated into two categories: targeted analyses that use  
80 only a subset of genes (selected based on their function or transcriptional regulation)  
81 or specific genetic/environmental perturbations, and global analyses that make use of  
82 hundreds or thousands of transcriptomes performed in various conditions, often  
83 publicly available ones, and do not select genes based on their function prior to the  
84 co-expression analysis. Co-expression networks are now commonly used in a variety  
85 of work in plant research, and have allowed the identification or prediction of new  
86 genes and transcription factors involved in development [9,11,12], in metabolic  
87 pathways [13] and in response to biotic and abiotic stresses [8,14–17]. It has also been  
88 proposed that the topology of the co-expression network and position of genes in the  
89 network can be of interest in itself to identify genes involved in natural diversity in  
90 development and in the response to environment [18,19].

91  
92 One limit of gene co-expression networks is that they only provide information about  
93 correlation in expression but do not indicate the direction and type of relationship  
94 between genes that are co-expressed. In order to define which genes are transcription  
95 factors (TF) that regulate the expression of other genes in the network, additional types  
96 of data should be used or integrated [20]. This additional data can be for example  
97 ChIP-seq [21,22] that provides the list of targets of a given transcription factor, protein-  
98 protein interaction [21,23], as well as the presence of TF binding motifs in the promoter  
99 of genes [24,25]. Another limit is that genes should exhibit changes in expression  
100 between the different samples used for the analysis in order to detect co-expressed

101 pairs of genes. This is usually achieved by using genetic and/or environmental  
102 perturbations in order to cause changes in the transcriptome regulation. However  
103 these perturbations often have large effects, and it can be time consuming and  
104 challenging to produce the large number of samples required. In order to analyse gene  
105 regulation in a biologically context that is more relevant, more subtle changes in  
106 expression might be preferred. This could be achieved by using milder genetic or  
107 environmental perturbations. Another option would be to analyse changes in  
108 expression that occur in the absence of any genetic or environmental perturbation [26].  
109 This can be possible in theory as widespread differences in gene expression levels  
110 have been observed between genetically identical plants, in the absence of any  
111 environmental perturbation [27–31]. The idea is to use this variability in gene  
112 expression to find potential co-regulation. In mammals, variability in gene expression  
113 between single cells of the same cell type has been used to identify co-expression  
114 patterns for genes that show a high level of gene expression variability between cells  
115 [32]. Moreover, gene co-expression networks have been inferred using transcriptomes  
116 of individual plant leaves, after removing *in silico* the genotype, environment and  
117 genotype x environment effects on gene expression [26]. The modules identified in  
118 this network were functionally relevant and this study allowed the identification of a  
119 new regulator of the jasmonate pathway [26]. It thus shows that the analysis of gene  
120 expression regulation can be as powerful in the absence of genetic and environmental  
121 fluctuation. However, the first step of the study of Bhosale and colleagues was to  
122 remove *in silico* the genotype, environment and genotype x environment effects on  
123 gene expression, as the transcriptomes were performed on plants from different  
124 genotypes, as well as plants that were grown in different research laboratories. It is

125 thus not clear if co-expression networks can be identified in plants from transcriptomes  
126 performed in the absence of genetic and environmental perturbation.

127

128 We thus decided to test if it is possible to infer gene co-expression networks using  
129 transcriptomes generated on single plants in the absence of any genetic and  
130 environmental perturbation. In particular, we wanted to define if such a network would  
131 provide different information compared to a network using environmental perturbation.  
132 Finally we wished to determine if modules that would be detected in such a network  
133 would have functional relevance. In order to answer these questions, we took  
134 advantage of the existence of a set of published transcriptomes carried out on single  
135 seedlings of the same genotype that were grown in the same environmental conditions  
136 [28]. In this dataset, multiple genetically identical seedlings had been harvested at  
137 several time points during a day/night cycle. Differences in expression between  
138 seedlings were previously observed for many genes in each time point of this dataset.  
139 In particular, 8.7% of the genes in this dataset have been identified as Highly Variable  
140 Genes (HVG), as their expression was statistically more variable between seedlings  
141 than the rest of the transcriptome. Using this dataset we were able to infer co-  
142 expression networks in absence of genetic and environmental perturbations. Based  
143 on enrichment in a module for genes involved in flavonoid metabolism, we speculated  
144 that AT4G22870, a 2-oxoglutarate (2OG) and Fe(II)-dependent oxygenase, could also  
145 have a role in flavonoid metabolism. Finally, we identified new targets for the TFs  
146 PHYTOCHROME INTERACTING FACTOR 4 (PIF4), GIGANTEA (GI) and PSEUDO-  
147 RESPONSE REGULATOR 5 (PRR5).

148

149

## 150 **Results**

### 151 **Co-expression networks can be inferred using expression variation between** 152 **individual seedlings**

153

154 Co-expression networks in plants are normally inferred using transcriptomes obtained  
155 from pools of plants, using genetic or environmental perturbations in order to identify  
156 genes that co-vary in expression between these conditions. In order to define if co-  
157 expression networks can be inferred from expression measurements obtained from  
158 single seedlings in the absence of genetic and environmental perturbations, we used  
159 the previously published dataset of transcriptomes generated on single seedlings  
160 grown in the same environment. This dataset contained a total of fourteen seedlings  
161 per time point, for twelve time points spanning a 24 hours day/night cycle [28].  
162 Widespread differences in expression levels have been observed between seedlings  
163 in this dataset, which is a prerequisite to be able to infer a co-expression network ([3–  
164 5] Fig 1a and S1). We first detected co-expressed genes in each time point, by  
165 measuring Spearman correlation for each pair of genes in profiles of expression in the  
166 14 seedlings of this time point. In order to keep robust correlations in the final network,  
167 we then selected edges of the network that are detected in at least four consecutive  
168 time points, with one gap allowed (Materials and Methods). Using this approach, we  
169 find a total of 4715 edges, connecting 1729 genes in this network, from now on referred  
170 to as the variability network. The number of edges detected for each time point varies  
171 from 787 to 3221, with a higher number of edges being detected at the end of the day  
172 and the beginning of the night (Fig 1b). We then used the Louvain community detection  
173 algorithm in order to identify modules of genes that are densely connected in the  
174 network [33]. In total, we identified 153 modules (Table S1), containing between 2 and

175 334 genes, with most of the modules only composed of two genes (Fig 1c). To test the  
176 robustness of the variability network, we also selected edges that are in at least 3  
177 consecutive time points and compared the detected modules in both networks (Fig  
178 S2). Similar modules with a similar overall connectivity between them are found in the  
179 two networks, which confirms the robustness of the modules in our original network.  
180 Modules in the network based on 4 consecutive time points are smaller. In some  
181 cases, several modules of the network based on 4 consecutive time points correspond  
182 to a single module in the network based on 3 consecutive time points and these  
183 smaller modules have differences in several features (Fig S2). That is why we decided  
184 to focus our analysis on the network obtained when selecting edges present in 4  
185 consecutive time points, and in particular for the 28 modules of this network containing  
186 5 genes or more.

187

188 **Fig 1. Inference of gene co-expression networks in absence of genetic and**  
189 **environmental perturbations**

190 (A) Description of co-expression network inference using transcriptomes performed  
191 on single seedlings. Transcriptomes were generated for a total of fourteen seedlings  
192 per time point, with twelve time points spanning a day/night cycle over 24 hours. In  
193 each time point, genes with correlated expression profiles in the fourteen seedlings  
194 were identified. The co-expression network was inferred based on pairs of genes  
195 correlated for at least four consecutive time points. Finally, modules in the network,  
196 which consist of groups of genes that are densely connected, were detected. (B) Total  
197 number of edges in the final network that are detected in each time point. (C)  
198 Distribution of the number of genes present in each of the 153 modules. Inset shows  
199 the same data plotted with a logarithmic scale. (D) Number of edges that are detected



200 in each time point for four modules: the module 1 in which most edges are detected  
201 during day time, the module 21 in which most edges are detected during the night  
202 time, the module 8 in which most edges are detected at the transition between night  
203 and day and the module 12 in which most edges are detected at the transition between  
204 day and night.

205

206

207 First we analysed the number of edges at each time point throughout the time course  
208 for each module (Fig 1d and S3). In most modules the edges are distributed non-  
209 uniformly across the 12 time points. Some exhibit a larger number of edges during the  
210 day or the night, while in other modules, a larger number of edges is observed at the  
211 transitions from night to day, or from day to night. It indicates that genes in these  
212 modules are co-regulated at some moments of the day/night cycle but not at others.  
213 While for some modules, this is linked with the genes being more expressed at these  
214 same times of the day (module 1 for example), this is not the case for other modules  
215 in which genes are expressed throughout the time course (module 12 for example, Fig  
216 2). Most of the edges in module 1 are observed during the day (Fig 1d) and we were  
217 able to confirm co-expression of genes in this module by doing a RT-qPCR in a  
218 replicate experiment for a few genes in this module. In this replicate experiment, we  
219 find a very high correlation during the day (ZT6), and a lower correlation during the  
220 night (ZT14) (Fig S4). On the other hand, most edges in module 21 are observed  
221 during the night (Fig 1d). We also find in a replicate RT-qPCR experiment that genes  
222 of module 21 were more correlated during the night than the day (Fig S4). These  
223 results confirm that the co-expression of genes in modules of the variability network,  
224 and also the differences in co-expression between the day and night, can be

225 reproduced in a replicate experiment. Moreover, we find that modules with a high  
226 percentage of edges during the night are more connected to one another than with  
227 modules for which most edges are observed during the day, and vice versa (Fig 5a).  
228 We can measure this assortativity of the network (i.e. the tendency of similar nodes to  
229 be connected to each other) through the Pearson correlation of the daytime-specific  
230 edge percentages of connected modules (Pearson correlation=0.4573, p-  
231 value=0.043). This result shows that modules that are more connected to one another  
232 are more similar, at least for this feature, indicating that the community detection in the  
233 network worked well and provides modules that are relevant.

234

235 **Fig 2. Comparison of the variability network and the averaged time course**  
236 **network**

237 Expression profiles throughout the time course for genes in each module with 5 genes  
238 or more, using the average expression of the fourteen seedlings for each time point.  
239 Each line represents the normalised expression (z-score) for one gene.  
240 Modules are ordered by the percentage of genes in the averaged time course network  
241 (high to low). Modules highlighted in blue contain 50% or more of genes that are also  
242 in the averaged time course network. Modules highlighted in red contain 15% or less  
243 of genes that are also in the averaged time course network.

244

245 **Fig 5. Network architecture is mainly influenced by the time of day when edges**  
246 **are detected, and by the presence of highly variable genes**

247 Organisation of modules in the network, with the size of circles representing the  
248 module size (i.e. number of edges). Number of edges connecting the modules are  
249 represented by the thickness of the lines between modules. The number in each

250 module corresponds to the module number. (A) Modules are color coded based on  
251 the percentage of edges that are detected during the night in each module. Blue  
252 modules are composed of a majority of night-time edges, while yellow modules are  
253 mainly composed of day-time edges. (B) Modules are color coded based on the  
254 percentage of highly variable genes (HVG) in the modules. Green modules are  
255 composed of a majority of HVG while red modules have a low percentage of HVG.

256

257 Since high gene expression variability between genetically identical plants was  
258 previously observed in the transcriptome dataset we used to infer the variability  
259 network [28], we tested if the network is enriched in highly variable genes (HVGs). We  
260 find a total of 477 HVGs in the network, that is 27.6% of all genes in the variability  
261 network. This is higher than the 8.7% of HVGs that were detected in the full  
262 transcriptome dataset [28]. This result suggests that most of the genes in the variability  
263 network do not have to display a high level of gene expression variability to be able to  
264 detect co-expression between individual seedlings. We find that most modules are  
265 either strongly enriched in HVGs, or strongly depleted in HVGs, with only a few  
266 modules containing around 27% of HVGs (Table 1, Fig S5a). Modules 37, 43 and 66  
267 for example are only composed of HVGs, while a total of 8 modules do not have a  
268 single HVG. This result suggests that HVGs can co-vary in expression and are  
269 potentially co-regulated. It also suggests that HVGs are not likely to co-vary in  
270 expression with non variable genes. To test if this result could indicate a bias in the  
271 method used to construct the variability network and detect modules, we analysed  
272 expression levels in single seedlings for genes in modules with high or low percentage  
273 of HVG (Fig S5b). We find that modules with high or low percentage of HVG have  
274 different expression profiles in the seedlings, indicating an absence of bias. Moreover,

275 modules with a high percentage of HVG tend to be more connected to one another  
 276 than with modules containing a low percentage of HVG, and vice versa (Pearson  
 277 correlation=0.6896, p-value= 0.0007683, Fig 5b).

278

| module name | number of genes in module | number of HVGs in module | percentage of HVGs in module | Fisher's p-value |
|-------------|---------------------------|--------------------------|------------------------------|------------------|
| 37          | 12                        | 12                       | 100,00                       | 0,0022           |
| 43          | 8                         | 8                        | 100,00                       | 0,0118           |
| 66          | 6                         | 6                        | 100,00                       | 0,0287           |
| 18          | 15                        | 14                       | 93,33                        | 0,0022           |
| 24          | 47                        | 42                       | 89,36                        | 0,0001           |
| 59          | 9                         | 8                        | 88,89                        | 0,0181           |
| 15          | 44                        | 38                       | 86,36                        | 0,0001           |
| 1           | 19                        | 15                       | 78,95                        | 0,0052           |
| 32          | 56                        | 43                       | 76,79                        | 0,0001           |
| 64          | 7                         | 5                        | 71,43                        | 0,1496           |
| 23          | 6                         | 4                        | 66,67                        | 0,2384           |
| 21          | 79                        | 50                       | 63,29                        | 0,0001           |
| 79          | 10                        | 6                        | 60,00                        | 0,1322           |
| 4           | 175                       | 97                       | 55,43                        | 0,0001           |
| 25          | 24                        | 9                        | 37,50                        | 0,4014           |
| 8           | 41                        | 8                        | 19,51                        | 0,4820           |
| 2           | 150                       | 17                       | 11,33                        | 0,0002           |
| 13          | 77                        | 6                        | 7,79                         | 0,0009           |
| 9           | 101                       | 3                        | 2,97                         | 0,0001           |
| 0           | 334                       | 3                        | 0,90                         | 0,0001           |
| 5           | 91                        | 0                        | 0,00                         | 0,0001           |
| 6           | 61                        | 0                        | 0,00                         | 0,0001           |
| 36          | 24                        | 0                        | 0,00                         | 0,0047           |
| 12          | 21                        | 0                        | 0,00                         | 0,0127           |
| 71          | 8                         | 0                        | 0,00                         | 0,2142           |
| 126         | 7                         | 0                        | 0,00                         | 0,3578           |
| 70          | 6                         | 0                        | 0,00                         | 0,3512           |
| 86          | 5                         | 0                        | 0,00                         | 0,5915           |

279

280 **Table 1.**

281 Number and percentage of HVGs in each module, for modules with at least 5 genes.

282

283 Our results show that gene co-expression networks can be inferred in the absence of  
 284 genetic or environmental perturbation. Moreover, genes don't need to show a high  
 285 level of gene expression variability between seedlings to be integrated in the network.

286

287 **Additional gene co-expression is identified in the variability network compared**  
288 **to a network inferred from a pool of plants.**

289

290 Next, we decided to test whether the co-expression network based on the variability  
291 of expression between genetically identical plants grown in the same environment is  
292 different from a co-expression network inferred from a pool of plants. Since the  
293 transcriptome dataset contains data for several time points throughout a day/night  
294 cycle, we decided to infer a co-expression network using the average expression of  
295 the fourteen seedlings for each time point and thus exploit changes in expression  
296 happening during the time course. This network, referred to as the averaged time  
297 course network, allows the identification of co-expression throughout the time course.  
298 Using this approach, we find a total of 9332 edges, connecting 3861 genes in the  
299 averaged time course network. A total of 524 genes of this averaged time course  
300 network are also present in the variability network, that is 30% of the genes in the  
301 variability network (Table 2). Only 35 edges are shared between the two networks.  
302 This result shows that the majority of the genes and edges present in the variability  
303 network are not detected in this dataset using a classical approach with pools of plants.  
304

| module name | number of genes in module | number of genes in module also in averaged time course network | percentage of genes in module also in averaged time course network | Fisher's p-value |
|-------------|---------------------------|----------------------------------------------------------------|--------------------------------------------------------------------|------------------|
| 71          | 8                         | 7                                                              | 87,5                                                               | 0,0585           |
| 13          | 77                        | 59                                                             | 76,6                                                               | 0,0001           |
| 126         | 7                         | 4                                                              | 57,1                                                               | 0,2947           |
| 8           | 41                        | 21                                                             | 51,2                                                               | 0,0671           |
| 70          | 6                         | 3                                                              | 50,0                                                               | 0,4431           |
| 21          | 79                        | 37                                                             | 46,8                                                               | 0,0431           |
| 25          | 24                        | 10                                                             | 41,7                                                               | 0,4146           |
| 37          | 12                        | 5                                                              | 41,7                                                               | 0,5666           |
| 9           | 101                       | 41                                                             | 40,6                                                               | 0,1273           |
| 23          | 6                         | 2                                                              | 33,3                                                               | 1                |
| 5           | 91                        | 29                                                             | 31,9                                                               | 0,8248           |
| 1           | 19                        | 6                                                              | 31,6                                                               | 1                |
| 12          | 21                        | 6                                                              | 28,6                                                               | 1                |
| 64          | 7                         | 2                                                              | 28,6                                                               | 1                |
| 36          | 24                        | 6                                                              | 25,0                                                               | 0,8289           |
| 24          | 47                        | 11                                                             | 23,4                                                               | 0,5296           |
| 4           | 175                       | 37                                                             | 21,1                                                               | 0,0592           |
| 0           | 334                       | 69                                                             | 20,7                                                               | 0,0063           |
| 86          | 5                         | 1                                                              | 20,0                                                               | 1                |
| 2           | 150                       | 26                                                             | 17,3                                                               | 0,0087           |
| 6           | 61                        | 10                                                             | 16,4                                                               | 0,0845           |
| 32          | 56                        | 9                                                              | 16,1                                                               | 0,0985           |
| 15          | 44                        | 6                                                              | 13,6                                                               | 0,0627           |
| 79          | 10                        | 1                                                              | 10,0                                                               | 0,4744           |
| 18          | 15                        | 1                                                              | 6,7                                                                | 0,1401           |
| 59          | 9                         | 0                                                              | 0,0                                                                | 0,1286           |
| 43          | 8                         | 0                                                              | 0,0                                                                | 0,2106           |
| 66          | 6                         | 0                                                              | 0,0                                                                | 0,3465           |

305

306 **Table 2.**

307 Number and percentage in each module of genes also detected in the averaged time  
308 course network.

309

310 We find that between 0% and 87.5% of genes in modules of the variability network are  
311 also in the averaged time course network, with most of the modules having between  
312 20 and 50% of genes also present in the averaged time course network (Table 2). The  
313 modules with the highest percentage of genes also in the averaged time course  
314 network are modules 71 (87%: 7 out of 8 genes) and 13 (76%: 59 out of 77 genes).

315 We find that genes in these modules have very similar and clear expression profiles  
316 throughout the time course (Fig 2). This is also the case for all modules with at least  
317 50% of genes in the averaged time course network (modules highlighted in blue in Fig  
318 2). This result could suggest that the reason why these modules contain many genes  
319 also present in the averaged time course network, is because their genes have very  
320 similar expression patterns throughout the day/night cycle. On the other hand, several  
321 modules that only have 15% or less of genes present in the averaged time course  
322 network are composed of genes without clear expression patterns during the time  
323 course. These results show that additional gene co-expression is identified in the  
324 variability network compared to the averaged time course network. Most importantly,  
325 using gene expression in single seedlings, co-expression between genes can be  
326 detected even in absence of expression patterns throughout the day/night cycle.

327

### 328 **Modules identified in the variability network are functionally relevant**

329

330 In order to define if the modules identified in the variability network are functionally  
331 relevant, we performed a gene ontology (GO) enrichment analysis. We find that some  
332 of the modules have strongly enriched GO (Table S2).

333 For example, the module 8 is enriched in multiple GO related to photosynthesis. In  
334 particular, 33 genes out of the 41 in this module are members of the photosystem I or  
335 II, or of the light harvesting complex (Fig 3a, Table S3). Other genes in this module  
336 also have functions related to photosynthesis: CURT1A is required for a proper  
337 thylakoid morphology [34], while RBCS1A, RBCS3B and RCA are members of the  
338 Rubisco or necessary to Rubisco light activation [35,36]. Most edges of module 8 are  
339 observed at the transition between night and day. This module contains 51% of genes

340 that are also in the averaged time course network, which could be expected as most  
341 of the genes have very similar expression patterns throughout the day/night cycle. In  
342 particular, all genes of this module present in the photosystem I, II or the light  
343 harvesting system have the same expression profile with a peak of expression at dawn  
344 and the beginning of the day, while other genes have different expression profiles with  
345 a peak of expression at the beginning of the day and another one during the night (Fig  
346 S6a). Also, we find that these other genes are at the periphery of the module 8 (Fig  
347 S6b), which highlights that these genes are less well correlated with the dense core of  
348 highly correlated photosystem genes in the centre of the network. Another module  
349 enriched in GO related with photosynthesis is module 37 (Table S2), in which 9 out of  
350 the 12 genes are chloroplast genes, some being present in the Photosystems I or II,  
351 in the Cytochrome b6/f complex or in the ATP synthase (Fig 3a, Table S3). Genes in  
352 module 37 are mainly expressed at the beginning of the day. These results suggest  
353 that the expression of genes involved in photosynthesis are co-regulated, not only over  
354 time, but also between plants at a given time.

355

356 **Fig 3. Modules enriched in genes involved in the photosynthesis and the**  
357 **glucosynolate pathway**

358 (A) Functional analysis of modules 8 and 37. For each module, the number of genes  
359 that are part of the Photosystem I (green), Photosystem II (orange), the Light  
360 harvesting complex (blue) or the ATP synthase (purple) are indicated. (B) Functional  
361 analysis of module 1. Genes of the module are color coded depending on their role in  
362 the glucosynolate pathway: biosynthesis (turquoise), transport (green) or regulation  
363 (orange). Genes previously identified as co-expressed with glucosynolate  
364 biosynthesis genes are also indicated (grey). On the right side, the glucosinolate



365 biosynthesis pathway is shown with an indication of the number of genes present in  
366 the module 1 at each step of the pathway.

367

368 Module 71 is enriched in GO related to DNA packaging (Table S2), and is in fact only  
369 composed of histones, including 2 variants of H2A, 2 variants of H2B, and H3.1 (Table  
370 S3). None of the genes in this module are HVGs, and 7 genes out of 8 are also present  
371 in the averaged time course network.

372

373 Module 1 is enriched in GO related to glucosinolate (Table S2). We find that 16 out of  
374 19 genes of the module are in the glucosinolate biosynthesis pathway, transporters of  
375 glucosinolate, or transcription factors (TF) regulating the pathway (Fig 3b, Table S3).  
376 All genes in module 1, except one, were previously identified as co-expressed, in a  
377 previous study of the glucosinolate pathway [13]. Among the genes that are not known  
378 to be involved in glucosinolate biosynthesis, but are co-expressed with it, AKN2 is  
379 regulated by the MYB TF also regulating the glucosinolate pathway [37]. AKN2 is  
380 involved in sulfate assimilation which is linked to glucosinolate metabolism [37]. It thus  
381 makes sense that AKN2 is co-expressed with genes of the glucosinolate biosynthesis  
382 pathway. Most edges of module 1 are observed during the day, which is when the  
383 genes in the module are more expressed. Also 15 out of the 19 genes of the modules  
384 are HVGs.

385

386 Module 43 is enriched in GO related to flavonoid metabolism (Table S2), with 6 out of  
387 8 genes shown to be involved in flavonoid biosynthesis [38]. Among the other genes,  
388 AT4G22870 has not been shown to be involved in the flavonoid pathway, and our  
389 result suggests that it might have a role in this pathway. It is a protein of the 2-

390 oxoglutarate (2OG) and Fe(II)-dependent oxygenase superfamily. We also find that all  
391 the genes in module 43 are HVGs. Most edges of the module are observed during the  
392 day, and the genes in the module have very similar expression patterns throughout  
393 the time course with a peak of expression at the beginning of the day and another one  
394 at the end of the day. However, none of the genes in the module 43 are also present  
395 in the averaged time course network.

396

397 Overall, we find that several modules in the variability network are functionally  
398 relevant, with modules showing enrichment for functions such as photosynthesis, DNA  
399 packaging and glucosinolate or flavonoid metabolism, even in the absence of genetic  
400 and environmental perturbations. Moreover, we could identify a potential role in the  
401 enriched pathways for some genes, based on their co-expression with other genes in  
402 the same module.

403

#### 404 **Identification of new targets for GI, PIF4 and PRR5**

405

406 To go further in the functional analysis of the modules, we looked for enrichment of  
407 targets of TFs in the modules. We focussed on TFs for which ChIP-seq were  
408 performed in similar conditions (seedlings grown in day/night cycles), and for which a  
409 list of target genes have been previously published [39–42]. This way, we identified an  
410 enrichment in modules for targets of SPL7, GI, PIF4 and PRR5 (Table S4). For  
411 example, all 41 genes in the module 8 are SPL7 targets (Table S4) [39]. This is  
412 significantly more compared to the entire network in which 244 genes are SPL7 targets  
413 (14%). SPL7 targets have been previously shown to be enriched in multiple GO terms,

414 including photosynthesis [39], in agreement with the predominant role in  
415 photosynthesis of genes in this module 8.

416 We also find that 6 out of 7 genes in the module 64 are targets of GI (Table S4, Fig  
417 4a). This is more compared to the entire network in which 394 genes are GI targets  
418 (22%). To explore more in detail GI binding at the genes in the module 64, we  
419 downloaded the ChIP-seq data, mapped it on the *Arabidopsis thaliana* genome and  
420 looked at the ChIP-seq signal for GI at all the 7 genes of the module 64 [40]. We find  
421 a strong signal for the GI ChIP-seq at the promoter of the 6 genes that were already  
422 identified as GI targets (Fig 4a). Interestingly, the signal for GI at the 7th gene,  
423 AT1G03630, not previously described as a GI target, is equally strong at the promoter  
424 of the gene (Fig 4a). This result indicates that AT1G03630 is also a target of GI, even  
425 if it has not been previously identified as such. AT1G03630, or PORC, encodes for a  
426 protein with protochlorophyllide oxidoreductase activity that is NADPH- and light-  
427 dependent [43].

428

429 **Fig 4. Additional TF targets can be identified using TF targets enrichment in**  
430 **modules**

431 (A) Analysis of GI TF targets on the module 64: 6 of the 7 genes in the module 64 are  
432 known targets of GI (left). IGV screenshot showing the signal for the GI ChIP-seq  
433 (right) at a known GI target (top) and for the seventh gene in the module 64 that is not  
434 known as a GI target (bottom). (B) Analysis of PIF4 TF targets on the module 86: 3 of  
435 the 5 genes in the module 86 are known targets of PIF4 (left). IGV screenshot showing  
436 the signal for the PIF4 ChIP-seq (right) at a known PIF4 target (top) and for the two  
437 other genes in the module 86 that are not known as a PIF4 target (bottom).

438

439 Another TF with enriched targets in some modules is PIF4. We find that 3 out of the 5  
440 genes (60%) in the module 86 are PIF4 targets (Table S3, Fig 4b), while only 305  
441 genes in the full network are PIF4 targets (17.6%). To explore more in detail PIF4  
442 binding at the genes in the module 86, we downloaded the ChIP-seq data, mapped it  
443 on the *Arabidopsis thaliana* genome and looked at the ChIP-seq signal for GI at all the  
444 5 genes of the module 86 [41]. We observe a strong signal for the PIF4 ChIP at the  
445 promoters of the 3 known targets in the module 86 (Fig 4b). We also see a clear signal  
446 for the PIF4 ChIP for the two other genes in the module 86, AT4G26542 and  
447 AT5G55730, suggesting that they are also targets of PIF4 (Fig 4b). AT4G26542 is an  
448 anti-sens transcript for AT4G26540. AT5G55730 (FLA1) encodes a fasciclin-like  
449 arabinogalactan-protein 1 [44].

450

451 Finally, we find an enrichment for PRR5 targets in modules 8 and 21 with respectively  
452 78% and 70% of genes in the module that are PRR5 targets [42]. For comparison,  
453 27% of all genes in the network are PRR5 targets. To explore more in detail PRR5  
454 binding at the genes in the module 8, we downloaded the ChIP-seq data, mapped it  
455 on the *Arabidopsis thaliana* genome and looked at the ChIP-seq signal for PRR5 at all  
456 the 41 genes of the module 8 [45]. We find a strong ChIP-seq PRR5 signal at the 32  
457 target genes in the module 8, and a similarly strong signal for most of the other 9 genes  
458 in the module that were not listed as a PRR5 target (Fig S7a). In order to look for PRR5  
459 targets, and to expand the analysis to other modules, we re-identified peaks for the  
460 PRR5 ChIP-seq and looked for PRR5 targets in the modules with a high proportion of  
461 already described PRR5 targets (Table S4). This way, we identified 5 additional PRR5  
462 targets in the module 8, and 9 additional PRR5 targets in the module 21. When  
463 combining the PRR5 targets from both analyses, the total percentage of PRR5 targets

464 is 90% in the module 8, and 83% in the module 21 (Fig S7b). These results suggest  
465 that most, if not all, genes in the module 8 and 21 are in fact PRR5 targets.

466

467 Overall, we find that some modules are enriched for TFs targets, and that this  
468 enrichment can be used to identify additional targets for the TF in the modules showing  
469 enrichment for its targets.

470

## 471 **Discussion**

472

473 In this work, we have analysed gene co-expression networks inferred using expression  
474 data generated in the absence of genetic and environmental perturbations. To do this,  
475 we made use of an already published dataset of transcriptomes performed on single  
476 seedlings that were grown in the same environment. We showed that genes do not  
477 need a high level of gene expression variability between seedlings to be able to  
478 integrate them in the network (Table 1). Moreover we find that modules identified in  
479 this network are biologically relevant, as several are strongly enriched in GOs (Fig 3)  
480 and in TF targets (Fig 4). Based on these enrichments, we speculated that AT4G22870  
481 could also have a role in flavonoid metabolism and identified new targets for the TFs  
482 GI, PIF4 and PRR5.

483

484 We find that it is possible to infer gene co-expression networks using transcriptomes  
485 of genetically identical plants grown in the exact same environment. This is in  
486 agreement with previous work, where co-expression networks have been inferred on  
487 transcriptomes generated on individual plants and for which genetic and  
488 environmental effects have been removed *in silico* [26]. We also find an interesting

489 topology of the network with some modules more connected with one another, and  
490 that connected modules share similar characteristics in terms of percentage of edges  
491 detected during the day or night, and percentage of HVG (Fig 5 and S8). We observe  
492 that modules have either a high or low percentage of HVG, but rarely a mix of HVG  
493 with non HVG. This suggests that some pathways are more variable than others. We  
494 find that, in general, modules with genes involved in the response to the environment  
495 are also composed of a high percentage of HVG. This is the case for example for the  
496 module 37, enriched in photosynthesis (100% of HVG), the module 43, enriched in  
497 flavonoid metabolism (100% of HVG), or the module 1, enriched in glucosinolate  
498 metabolism (78% of HVG). Flavonoids are secondary metabolites and have been  
499 shown to be involved in many biotic and abiotic responses in plants [46]. And  
500 glucosinolates are involved in the response to pathogens [47]. In agreement with our  
501 observation, previous work showed that HVG are usually involved in the response to  
502 the environment [28,48–51]. In particular, plant-to-plant variability has already been  
503 observed for glucosinolates [30], showing that the variability in expression we observe  
504 for genes involved in this pathway can lead to differences in glucosinolate content  
505 between plants.

506  
507 Like for Bhosale and colleagues, we find that the modules of the network identified in  
508 absence of genetic and environmental perturbation are biologically relevant and can  
509 be used to speculate new gene function or regulation. We only explored the function  
510 for the most obvious GO enrichment in modules as GO can be sparse for some  
511 functions and many genes do not have a GO. For example the module 43 is enriched  
512 in genes involved in the flavonoid pathway. We speculate that AT4G22870, a member  
513 of this module, is also involved in the flavonoid pathway. To support our suggestion,

514 AT4G22870 codes for a protein of the 2-oxoglutarate (2OG) and Fe(II)-dependent  
515 oxygenase superfamily and three 2-oxoglutarate- and ferrous iron-dependent  
516 oxygenases have been previously shown to be involved in flavonoid biosynthesis [38].  
517 Most importantly, this new potential candidate gene could not have been detected by  
518 analysing the network inferred using day/night environmental fluctuations as none of  
519 the genes in the module 43 are also present in the averaged time course network.  
520 We find several modules with enrichment for genes involved in photosynthesis. In  
521 particular, the modules 8 and 37. The main distinction between these two modules is  
522 that module 8 is composed of genes from the nuclear genome, while module 37 is  
523 mainly composed of genes from the chloroplast genome. Our approach was not  
524 designed to specifically identify and separate genes from different organelles,  
525 suggesting that genes from the nuclear and chloroplast genomes involved in  
526 photosynthesis vary differently in expression between seedlings. Our result is in  
527 agreement with the fact that organelle functional modules can be detected in  
528 *Arabidopsis thaliana* [52]. However, genes that are not from the nuclear genome are  
529 usually ignored in network analysis, and it would be of interest to integrate them in the  
530 future.

531  
532 Finally, we identified enrichment for targets of the TFs GI, PIF4 and PRR5 in different  
533 modules, and used this enrichment to highlight new targets. We find that in most  
534 cases, when a module is enriched in targets for a TF, the remaining genes of that  
535 module are also targets of this TF. By reanalysing the ChIP-seq data for PRR5, we  
536 could increase the percentage of targets in modules already showing a strong  
537 enrichment. This result shows the double interest of combining co-expression  
538 networks with ChIP-seq data [21,22]. On the one hand, ChIP-seq data adds

539 information about the regulation of genes in the co-expression network. On the other  
540 hand, the co-expression network is a good way to focus on some of the targets of the  
541 TF to better understand their regulation and also to detect extra targets. In the case of  
542 PRR5, we find that 90% of the genes in the module 8 are targets of this TF. Genes in  
543 the module 8 are involved in photosynthesis. This is in agreement with the fact that  
544 the circadian clock, of which PRR5 is a core member, has been shown to regulate the  
545 photosynthesis [53–55].

546 The functional characterisation of the network has been restricted to some modules  
547 with obvious GO enrichments, and to TFs for which ChIP-seq data and lists of targets  
548 were available and performed in similar conditions. However this network, being the  
549 first to be performed in absence of genetic and environmental fluctuation, could bring  
550 further information on other pathways we have not explored in this paper. Moreover,  
551 our approach could reveal co-regulations that might not be detected using  
552 environmental perturbations, as shown by the fact that the variability network provided  
553 additional co-expression relationships that were not detected in a network inferred on  
554 the same dataset using expression fluctuations caused by the day/night cycle. That is  
555 why we encourage readers to look at the modules for their genes or pathway of  
556 interest, and have developed an interactive website where readers can do so  
557 (<https://jlggroup.shinyapps.io/VariabilityNetwork/>).

558

559 We show that most genes in the network are not HVG (Table 1), showing that high  
560 gene expression variability between seedlings is not needed to be able to detect co-  
561 expression. These results indicate that we are not in the presence of random  
562 fluctuation in expression, or noise, but that pathways are slightly differently regulated  
563 in individual seedlings even if the plants are in the same environment. Our approach



564 uses these small differences between seedlings that might be caused by micro-  
565 environmental fluctuation, or a different state of the plant caused by internal factors. It  
566 indicates that plants are very sensitive to minor changes in their environment, and that  
567 we could harness this sensitivity to better understand gene expression regulation.  
568 Phenotypic differences have been observed between genetically identical plants  
569 grown in the same environment [27,29,30,56–58], indicating that the changes in  
570 expression of pathways we highlight here might be physiologically relevant. It shows  
571 that it is not necessary to perform experiments in very different environmental  
572 conditions to identify co-expression networks that could be relevant to the studied  
573 pathway. Strong fluctuations (mutants, over-expressors, environmental fluctuations)  
574 could potentially affect a big part of the transcriptome that could mask some co-  
575 expressions of interest showing the usefulness of our approach in some contexts. Our  
576 work shows the interest in harnessing gene expression variability between genetically  
577 identical individual plants in order to better understand gene regulation in a context  
578 where differences between plants are not known and probably very subtle.

579

## 580 **Materials and Methods**

### 581 **Transcriptome data**

582 The transcriptomes we used were already published (GSE115583; [28]), and  
583 performed on single seedlings, for a total of fourteen seedlings per time point every  
584 two hours over a 24 hours cycle. Expression levels and corrected variability levels for  
585 all genes were downloaded from <https://ilgroup.shinyapps.io/AraNoisy/>, as this data  
586 had been already corrected as previously described [28].

587

### 588 **Network construction**

589 *Variability network*: For each of the 12 time points (0h, 2h, 4h, ... 22h) we calculated  
590 the Spearman correlation between every pair of genes, using their expression profiles  
591 across the 14 seedlings (Fig 1a). Using a Benjamini-Hochberg correction with a false-  
592 discovery rate of 10% the most significant correlations were selected, and further  
593 filtered by only considering those for which a significant correlation appeared in four  
594 consecutive time points (with one gap allowed, e.g. 8h, 10h, 14h, 16h). These  
595 correlations form the edges of the variability network. We also calculated a version of  
596 the network using a filter that only required three consecutive time points, and  
597 calculated network modules using the same community detection algorithm. As can  
598 be seen in Fig S1, similar modules with a similar overall connectivity between them  
599 are found, which confirms the robustness of the modules in our original network. All  
600 network analysis was carried out using the Python NetworkX and python-louvain  
601 libraries.

602

603 *Averaged time course network*: For the averaged time course network we calculated  
604 the mean expression across all seedlings for every time point, generating a time series  
605 of average expression for every gene. We again calculated the Spearman correlations  
606 for every pair of genes and generated a network by applying the Bonferroni correction  
607 as a (highly conservative) significance cutoff. This yielded a network that was similar  
608 in size to the variability network. All network analysis was carried out using the Python  
609 NetworkX and python-louvain libraries.

610

### 611 **Community detection**

612 The Louvain algorithm [33] community detection algorithm was used to identify  
613 modules in the networks. This algorithm attempts to maximise the modularity of the

614 network by searching the space of network partitions. Due to the size of the search  
615 space it is unable to find the global maximum. The composition of modules may  
616 therefore (as with most community detection algorithms) vary somewhat between runs  
617 of the algorithm.

618

### 619 **RT-qPCR**

620 Col-0 WT *Arabidopsis thaliana* seeds were sterilised, stratified for 3 days at 4°C in  
621 dark and transferred for germination on solid 1/2X Murashige and Skoog (MS) media  
622 at 22°C in long days for 24 hours. Using a binocular microscope, seeds that were at  
623 the same stage of germination were transferred into a new plate containing solid 1/2X  
624 MS media. Seedlings were grown at 22°C, 65% humidity, with 12 hours of light (170  
625 µmoles) and 12 hours of dark in a conviron reach-in cabinet. After 7 days of growth,  
626 seedlings were harvested individually into a 96-well plate and flash-frozen in dry ice.  
627 Sixteen seven-day old Col-0 WT *Arabidopsis thaliana* seedlings were harvested  
628 individually and flash-frozen in dry ice at ZT6 and at ZT14. All seedlings harvested in  
629 a given time point were grown in the same plate. Total RNA was isolated from 1 ground  
630 seedling. RNA concentration was assessed using Qubit RNA HS assay kit. cDNA  
631 synthesis was performed on 700ng of DNase treated RNA using the Transcriptor First  
632 Strand cDNA Synthesis Kit. For RT-qPCR analysis, 0.4 µl of cDNA was used as  
633 template in a 10 µl reaction performed in the LightCycler 480 instrument using LC480  
634 SYBR green I master. Gene expression relative to two control genes (SandF and  
635 PP2A) was measured (See Table S5 for the list of primers used for RT-qPCR).

636

### 637 **Gene Ontology term enrichment**

638 We used the Ontologizer [59] command line tool with Bonferroni multiple-hypothesis  
639 correction to perform Gene Ontology (GO) term enrichment analysis of the network  
640 modules. Only the significantly enriched non redundant GO are shown.

641

## 642 **ChIP-seq data and analysis**

643 ChIP-seq data were downloaded from GSE45213 for SPL7 [39], from GSE129865 for  
644 GI [40], from GSE43286 for PIF4 [41] and from GSE36361 for PRR5 [42].

645 ChIP-seq data were analysed in house, using a combination of publicly available  
646 software and in-house scripts. Reads were aligned to the TAIR10 genome using  
647 Bowtie2 [60]. Potential optical duplicates were removed using Picard tools  
648 (<https://github.com/broadinstitute/picard>). Peak calling was performed using MASC2  
649 [61], with the corresponding INPUT used as a reference. Snapshots of ChIP-seq signal  
650 around targets were shown using the Integrative Genomics Viewer (IGV [62] ).

651

## 652 **Authors' contribution**

653 SC conceived the project. SC, JCWL and SA designed the project. SA inferred the  
654 networks. SC and SA performed downstream analyses of the network and SC  
655 interpreted the data. MB performed the RT-qPCR validation. SC, JCWL and SA  
656 wrote the article, with SC writing the first draft.

657

## 658 **Bibliography**

- 659 1. Stuart JM, Segal E, Koller D, Kim SK. A gene-coexpression network for global  
660 discovery of conserved genetic modules. *Science*. 2003;302: 249–255.  
661 doi:10.1126/science.1087447
- 662 2. Serin EAR, Nijveen H, Hilhorst HWM, Ligterink W. Learning from Co-

- 663 expression Networks: Possibilities and Challenges. *Front Plant Sci.* 2016;7:  
664 444. doi:10.3389/fpls.2016.00444
- 665 3. Contreras-López O, Moyano TC, Soto DC, Gutiérrez RA. Step-by-Step  
666 Construction of Gene Co-expression Networks from High-Throughput  
667 Arabidopsis RNA Sequencing Data. *Methods Mol Biol.* 2018;1761: 275–301.  
668 doi:10.1007/978-1-4939-7747-5\_21
- 669 4. Ruan J, Dean AK, Zhang W. A general co-expression network-based  
670 approach to gene expression analysis: comparison and applications. *BMC*  
671 *Syst Biol.* 2010;4: 8. doi:10.1186/1752-0509-4-8
- 672 5. Usadel B, Obayashi T, Mutwil M, Giorgi FM, Bassel GW, Tanimoto M, et al.  
673 Co-expression tools for plant biology: opportunities for hypothesis generation  
674 and caveats. *Plant Cell Environ.* 2009;32: 1633–1651. doi:10.1111/j.1365-  
675 3040.2009.02040.x
- 676 6. Mao L, Van Hemert JL, Dash S, Dickerson JA. Arabidopsis gene co-  
677 expression network and its functional modules. *BMC Bioinformatics.* 2009;10:  
678 346. doi:10.1186/1471-2105-10-346
- 679 7. Aoki K, Ogata Y, Shibata D. Approaches for extracting practical information  
680 from gene co-expression networks in plant biology. *Plant Cell Physiol.*  
681 2007;48: 381–390. doi:10.1093/pcp/pcm013
- 682 8. Liu W, Lin L, Zhang Z, Liu S, Gao K, Lv Y, et al. Gene co-expression network  
683 analysis identifies trait-related modules in *Arabidopsis thaliana*. *Planta.*  
684 2019;249: 1487–1501. doi:10.1007/s00425-019-03102-9
- 685 9. de Luis Balaguer MA, Fisher AP, Clark NM, Fernandez-Espinosa MG, Möller  
686 BK, Weijers D, et al. Predicting gene regulatory networks by combining spatial

- 687 and temporal gene expression data in Arabidopsis root stem cells. Proc Natl  
688 Acad Sci USA. 2017;114: E7632–E7640. doi:10.1073/pnas.1707566114
- 689 10. Zheng X, Liu T, Yang Z, Wang J. Large cliques in Arabidopsis gene  
690 coexpression network and motif discovery. J Plant Physiol. 2011;168: 611–  
691 618. doi:10.1016/j.jplph.2010.09.010
- 692 11. Silva AT, Ribone PA, Chan RL, Ligterink W, Hilhorst HWM. A Predictive  
693 Coexpression Network Identifies Novel Genes Controlling the Seed-to-  
694 Seedling Phase Transition in Arabidopsis thaliana. Plant Physiol. 2016;170:  
695 2218–2231. doi:10.1104/pp.15.01704
- 696 12. Xie W, Huang J, Liu Y, Rao J, Luo D, He M. Exploring potential new floral  
697 organ morphogenesis genes of Arabidopsis thaliana using systems biology  
698 approach. Front Plant Sci. 2015;6: 829. doi:10.3389/fpls.2015.00829
- 699 13. Wisecaver JH, Borowsky AT, Tzin V, Jander G, Kliebenstein DJ, Rokas A. A  
700 global coexpression network approach for connecting genes to specialized  
701 metabolic pathways in plants. Plant Cell. 2017;29: 944–959.  
702 doi:10.1105/tpc.17.00009
- 703 14. Sharma R, Singh G, Bhattacharya S, Singh A. Comparative transcriptome  
704 meta-analysis of Arabidopsis thaliana under drought and cold stress. PLoS  
705 ONE. 2018;13: e0203266. doi:10.1371/journal.pone.0203266
- 706 15. Shaik R, Ramakrishna W. Genes and co-expression modules common to  
707 drought and bacterial stress responses in Arabidopsis and rice. PLoS ONE.  
708 2013;8: e77261. doi:10.1371/journal.pone.0077261
- 709 16. Amrine KCH, Blanco-Ulate B, Cantu D. Discovery of core biotic stress  
710 responsive genes in Arabidopsis by weighted gene co-expression network

- 711 analysis. PLoS ONE. 2015;10: e0118731. doi:10.1371/journal.pone.0118731
- 712 17. Prasch CM, Sonnewald U. Simultaneous application of heat, drought, and  
713 virus to Arabidopsis plants reveals significant shifts in signaling networks. Plant  
714 Physiol. 2013;162: 1849–1866. doi:10.1104/pp.113.221044
- 715 18. Ichihashi Y, Aguilar-Martínez JA, Farhi M, Chitwood DH, Kumar R, Millon LV,  
716 et al. Evolutionary developmental transcriptomics reveals a gene network  
717 module regulating interspecific diversity in plant leaf shape. Proc Natl Acad Sci  
718 USA. 2014;111: E2616-21. doi:10.1073/pnas.1402835111
- 719 19. Des Marais DL, Guerrero RF, Lasky JR, Scarpino SV. Topological features of  
720 a gene co-expression network predict patterns of natural diversity in  
721 environmental response. Proc Biol Sci. 2017;284. doi:10.1098/rspb.2017.0914
- 722 20. Rao X, Dixon RA. Co-expression networks for plant biology: why and how.  
723 Acta Biochim Biophys Sin (Shanghai). 2019;51: 981–988.  
724 doi:10.1093/abbs/gmz080
- 725 21. Kulkarni SR, Vandepoele K. Inference of plant gene regulatory networks using  
726 data-driven methods: A practical overview. Biochim Biophys Acta Gene Regul  
727 Mech. 2019; 194447. doi:10.1016/j.bbagr.2019.194447
- 728 22. Chen D, Yan W, Fu L-Y, Kaufmann K. Architecture of gene regulatory  
729 networks controlling flower development in Arabidopsis thaliana. Nat Commun.  
730 2018;9: 4534. doi:10.1038/s41467-018-06772-3
- 731 23. He F, Zhou Y, Zhang Z. Deciphering the Arabidopsis floral transition process  
732 by integrating a protein-protein interaction network and gene expression data.  
733 Plant Physiol. 2010;153: 1492–1505. doi:10.1104/pp.110.153650
- 734 24. Vandepoele K, Quimbaya M, Casneuf T, De Veylder L, Van de Peer Y.

- 735 Unraveling transcriptional control in Arabidopsis using cis-regulatory elements  
736 and coexpression networks. *Plant Physiol.* 2009;150: 535–546.  
737 doi:10.1104/pp.109.136028
- 738 25. Ma S, Shah S, Bohnert HJ, Snyder M, Dinesh-Kumar SP. Incorporating motif  
739 analysis into gene co-expression networks reveals novel modular expression  
740 pattern and new signaling pathways. *PLoS Genet.* 2013;9: e1003840.  
741 doi:10.1371/journal.pgen.1003840
- 742 26. Bhosale R, Jewell JB, Hollunder J, Koo AJK, Vuylsteke M, Michael T, et al.  
743 Predicting gene function from uncontrolled expression variation among  
744 individual wild-type Arabidopsis plants. *Plant Cell.* 2013;25: 2865–2877.  
745 doi:10.1105/tpc.113.112268
- 746 27. Jimenez-Gomez JM, Corwin JA, Joseph B, Maloof JN, Kliebenstein DJ.  
747 Genomic analysis of QTLs and genes altering natural variation in stochastic  
748 noise. *PLoS Genet.* 2011;7: e1002295. doi:10.1371/journal.pgen.1002295
- 749 28. Cortijo S, Aydin Z, Ahnert S, Locke JC. Widespread inter-individual gene  
750 expression variability in Arabidopsis thaliana. *Mol Syst Biol.* 2019;15: e8591.  
751 doi:10.15252/msb.20188591
- 752 29. Hall MC, Dworkin I, Ungerer MC, Purugganan M. Genetics of  
753 microenvironmental canalization in Arabidopsis thaliana. *Proc Natl Acad Sci*  
754 *USA.* 2007;104: 13717–13722. doi:10.1073/pnas.0701936104
- 755 30. Mönchgesang S, Strehmel N, Trutschel D, Westphal L, Neumann S, Scheel D.  
756 Plant-to-Plant Variability in Root Metabolite Profiles of 19 Arabidopsis thaliana  
757 Accessions Is Substance-Class-Dependent. *Int J Mol Sci.* 2016;17.  
758 doi:10.3390/ijms17091565



- 759 31. Shen X, Pettersson M, Rönnegård L, Carlborg Ö. Inheritance beyond plain  
760 heritability: variance-controlling genes in *Arabidopsis thaliana*. *PLoS Genet.*  
761 2012;8: e1002839. doi:10.1371/journal.pgen.1002839
- 762 32. Mantsoki A, Devailly G, Joshi A. Gene expression variability in mammalian  
763 embryonic stem cells using single cell RNA-seq data. *Comput Biol Chem.*  
764 2016;63: 52–61. doi:10.1016/j.compbiolchem.2016.02.004
- 765 33. Blondel VD, Guillaume J-L, Lambiotte R, Lefebvre E. Fast unfolding of  
766 communities in large networks. *J Stat Mech.* 2008;2008: P10008.  
767 doi:10.1088/1742-5468/2008/10/P10008
- 768 34. Pribil M, Sandoval-Ibáñez O, Xu W, Sharma A, Labs M, Liu Q, et al. Fine-  
769 Tuning of Photosynthesis Requires CURVATURE THYLAKOID1-Mediated  
770 Thylakoid Plasticity. *Plant Physiol.* 2018;176: 2351–2364.  
771 doi:10.1104/pp.17.00863
- 772 35. Izumi M, Tsunoda H, Suzuki Y, Makino A, Ishida H. RBCS1A and RBCS3B,  
773 two major members within the *Arabidopsis* RBCS multigene family, function to  
774 yield sufficient Rubisco content for leaf photosynthetic capacity. *J Exp Bot.*  
775 2012;63: 2159–2170. doi:10.1093/jxb/err434
- 776 36. Carmo-Silva AE, Salvucci ME. The regulatory properties of Rubisco activase  
777 differ among species and affect photosynthetic induction during light  
778 transitions. *Plant Physiol.* 2013;161: 1645–1655. doi:10.1104/pp.112.213348
- 779 37. Yatusевич R, Mugford SG, Matthewman C, Gigolashvili T, Frerigmann H,  
780 Delaney S, et al. Genes of primary sulfate assimilation are part of the  
781 glucosinolate biosynthetic network in *Arabidopsis thaliana*. *Plant J.* 2010;62:  
782 1–11. doi:10.1111/j.1365-313X.2009.04118.x

- 783 38. Saito K, Yonekura-Sakakibara K, Nakabayashi R, Higashi Y, Yamazaki M,  
784 Tohge T, et al. The flavonoid biosynthetic pathway in Arabidopsis: structural  
785 and genetic diversity. *Plant Physiol Biochem.* 2013;72: 21–34.  
786 doi:10.1016/j.plaphy.2013.02.001
- 787 39. Zhang H, Zhao X, Li J, Cai H, Deng XW, Li L. MicroRNA408 is critical for the  
788 *HY5-SPL7* gene network that mediates the coordinated response to light and  
789 copper. *Plant Cell.* 2014;26: 4933–4953. doi:10.1105/tpc.114.127340
- 790 40. Nohales MA, Liu W, Duffy T, Nozue K, Sawa M, Pruneda-Paz JL, et al. Multi-  
791 level Modulation of Light Signaling by GIGANTEA Regulates Both the Output  
792 and Pace of the Circadian Clock. *Dev Cell.* 2019;49: 840-851.e8.  
793 doi:10.1016/j.devcel.2019.04.030
- 794 41. Pfeiffer A, Shi H, Tepperman JM, Zhang Y, Quail PH. Combinatorial  
795 complexity in a transcriptionally centered signaling hub in Arabidopsis. *Mol*  
796 *Plant.* 2014;7: 1598–1618. doi:10.1093/mp/ssu087
- 797 42. Liu TL, Newton L, Liu M-J, Shiu S-H, Farré EM. A G-Box-Like Motif Is  
798 Necessary for Transcriptional Regulation by Circadian Pseudo-Response  
799 Regulators in Arabidopsis. *Plant Physiol.* 2016;170: 528–539.  
800 doi:10.1104/pp.15.01562
- 801 43. Gabruk M, Steckka A, Strzałka W, Kruk J, Strzałka K, Mysliwa-Kurdziel B.  
802 Photoactive protochlorophyllide-enzyme complexes reconstituted with PORA,  
803 PORB and PORC proteins of *A. thaliana*: fluorescence and catalytic  
804 properties. *PLoS ONE.* 2015;10: e0116990. doi:10.1371/journal.pone.0116990
- 805 44. Johnson KL, Kibble NAJ, Bacic A, Schultz CJ. A fasciclin-like arabinogalactan-  
806 protein (FLA) mutant of Arabidopsis thaliana, *fla1*, shows defects in shoot

- 807 regeneration. PLoS ONE. 2011;6: e25154. doi:10.1371/journal.pone.0025154
- 808 45. Nakamichi N, Kiba T, Kamioka M, Suzuki T, Yamashino T, Higashiyama T, et  
809 al. Transcriptional repressor PRR5 directly regulates clock-output pathways.  
810 Proc Natl Acad Sci USA. 2012;109: 17123–17128.  
811 doi:10.1073/pnas.1205156109
- 812 46. Tohge T, de Souza LP, Fernie AR. Current understanding of the pathways of  
813 flavonoid biosynthesis in model and crop plants. J Exp Bot. 2017;68: 4013–  
814 4028. doi:10.1093/jxb/erx177
- 815 47. Burow M, Halkier BA, Kliebenstein DJ. Regulatory networks of glucosinolates  
816 shape *Arabidopsis thaliana* fitness. Curr Opin Plant Biol. 2010;13: 348–353.  
817 doi:10.1016/j.pbi.2010.02.002
- 818 48. Gasch AP, Yu FB, Hose J, Escalante LE, Place M, Bacher R, et al. Single-cell  
819 RNA sequencing reveals intrinsic and extrinsic regulatory heterogeneity in  
820 yeast responding to stress. PLoS Biol. 2017;15: e2004050.  
821 doi:10.1371/journal.pbio.2004050
- 822 49. Newman JRS, Ghaemmaghami S, Ihmels J, Breslow DK, Noble M, DeRisi JL,  
823 et al. Single-cell proteomic analysis of *S. cerevisiae* reveals the architecture of  
824 biological noise. Nature. 2006;441: 840–846. doi:10.1038/nature04785
- 825 50. Yin S, Wang P, Deng W, Zheng H, Hu L, Hurst LD, et al. Dosage  
826 compensation on the active X chromosome minimizes transcriptional noise of  
827 X-linked genes in mammals. Genome Biol. 2009;10: R74. doi:10.1186/gb-  
828 2009-10-7-r74
- 829 51. Hirao K, Nagano AJ, Awazu A. Noise-plasticity correlations of gene expression  
830 in the multicellular organism *Arabidopsis thaliana*. J Theor Biol. 2015;387: 13–

- 831 22. doi:10.1016/j.jtbi.2015.09.017
- 832 52. Penga J, Wang T, Huc J, Wang Y, Chen J. Constructing networks of organelle  
833 functional modules in arabidopsis. *Curr Genomics*. 2016;17: 427–438.  
834 doi:10.2174/1389202917666160726151048
- 835 53. Schaffer R, Landgraf J, Accerbi M, Simon V, Larson M, Wisman E. Microarray  
836 analysis of diurnal and circadian-regulated genes in Arabidopsis. *Plant Cell*.  
837 2001;13: 113–123. doi:10.1105/tpc.13.1.113
- 838 54. Harmer SL, Hogenesch JB, Straume M, Chang HS, Han B, Zhu T, et al.  
839 Orchestrated transcription of key pathways in Arabidopsis by the circadian  
840 clock. *Science*. 2000;290: 2110–2113. doi:10.1126/science.290.5499.2110
- 841 55. Dodd AN, Kusakina J, Hall A, Gould PD, Hanaoka M. The circadian regulation  
842 of photosynthesis. *Photosyn Res*. 2014;119: 181–190. doi:10.1007/s11120-  
843 013-9811-8
- 844 56. Forde BG. Is it good noise? The role of developmental instability in the shaping  
845 of a root system. *J Exp Bot*. 2009;60: 3989–4002. doi:10.1093/jxb/erp265
- 846 57. Paxman GJ. Differentiation and Stability in the Development of *Nicotiana*  
847 *rustica*. *Ann Bot*. 1956;20: 331–347. doi:10.1093/oxfordjournals.aob.a083526
- 848 58. Sakai K, Shimamoto Y. Developmental instability in leaves and flowers of  
849 *NICOTIANA TABACUM*. *Genetics*. 1965;51: 801–813.
- 850 59. Bauer S, Grossmann S, Vingron M, Robinson PN. Ontologizer 2.0--a  
851 multifunctional tool for GO term enrichment analysis and data exploration.  
852 *Bioinformatics*. 2008;24: 1650–1651. doi:10.1093/bioinformatics/btn250
- 853 60. Langmead B, Trapnell C, Pop M, Salzberg SL. Ultrafast and memory-efficient

854 alignment of short DNA sequences to the human genome. *Genome Biol.*

855 2009;10: R25. doi:10.1186/gb-2009-10-3-r25

856 61. Zhang Y, Liu T, Meyer CA, Eeckhoute J, Johnson DS, Bernstein BE, et al.

857 Model-based analysis of ChIP-Seq (MACS). *Genome Biol.* 2008;9: R137.

858 doi:10.1186/gb-2008-9-9-r137

859 62. Robinson JT, Thorvaldsdóttir H, Winckler W, Guttman M, Lander ES, Getz G,

860 et al. Integrative genomics viewer. *Nat Biotechnol.* 2011;29: 24–26.

861 doi:10.1038/nbt.1754

862

### 863 **Supplementary Figures and Tables legends**

#### 864 **Supplementary figure 1**

865 Expression in seedlings of genes in module 1, from the RNA-seq data, with one line

866 per gene. Expression is mean normalised for each gene.

867

#### 868 **Supplementary figure 2**

869 Comparison of edges in modules detected in the networks containing edges present

870 in 3 or 4 consecutive time points. Modules detected in the network based on edges

871 present in at least 3 consecutive time points are shown in blue. Modules detected in

872 the network based on edges present in at least 3 consecutive time points are shown

873 in red. For the later, the percentage of edges of the modules that are also detected in

874 the blue modules are indicated.

875

#### 876 **Supplementary figure 3**

877 Number of edges in the final network that are detected in each time point, for every  
878 module containing at least 5 genes.

879

#### 880 **Supplementary figure 4**

881 a. Correlation in expression between seedlings for genes of the module 1 and module  
882 21, for the RNA-seq experiment. AT5G07690 at ZT14 was removed as it is not  
883 expressed.

884 b. Correlation in expression between seedlings for genes of the module 1 and module  
885 21, based on a RT-qPCR replicate of the RNA-seq experiment. Sixteen seedlings  
886 where harvested at ZT6 and at ZT14.

887 c. Normalised expression level in the fourteen seedlings for the genes of the module  
888 21, from the RNA-seq data. Expression level for AT4G13250 is shown as the x axis  
889 while expression for the other genes of the module are shown on the y axis.  
890 Expression is mean normalised for each gene.

891

#### 892 **Supplementary figure 5**

893 a. Inter-individual gene expression variability profiles throughout the time course for  
894 genes in each module with 5 genes or more. Each line represents the corrected  
895 variability level for one gene: : corrected  $CV^2 = [\log_2(CV^2/trend)]$ , with  
896  $CV^2 = \text{variance}/(\text{average}^2)$  (see Cortijo et al., 2019).

897 Modules are ordered by the percentage of HVG (high to low). Modules highlighted in  
898 blue contain 75% or more of HVGs. Modules highlighted in red contain 10% or less of  
899 HVGs.

900 b. Heatmap of normalized gene expression for genes in modules 2, 6 (less than 15%  
901 HVG), module 4 (55% of HVG) and modules 15 and 24 (more than 85% of HVG).  
902 Expression is shown in single seedlings from the time point ZT20. Expression is mean  
903 normalised: expression in a seedling/ averaged expression in all seedlings. The left  
904 color coded bar indicates the module of each gene.

905

### 906 **Supplementary figure 6**

907 a. Expression profiles throughout the time course for genes in module 8. Each line  
908 represents the normalised expression (z-score) for one gene. Genes of the  
909 photosystem I, II or the light harvesting system are in blue.

910 b. All edges and nodes of module 8. Genes of the photosystem I, II or the light  
911 harvesting system are in blue.

912

### 913 **Supplementary figure 7**

914 a. Analysis of PRR5 TF targets on the module 8. 32 of the 41 genes in the module 8  
915 are known targets of PRR5 (left). IGV screenshot showing the signal for the PRR5  
916 ChIP-seq (right) at a known PRR5 target (top) and for a gene in the module 64 that is  
917 not known as a PRR5 target (bottom).

918 b. Comparison of published (blue) and realised (grey) PRR5 targets in modules 8 (left)  
919 and 21 (right).

920

### 921 **Supplementary figure 8**

922 Organisation of modules in the network, with the size of circles representing the

923 module size (i.e. number of edges). Number of edges connecting the modules are  
924 represented by the thickness of the lines between modules.

925 a. Most enriched GOs are written in each module.

926 b. Modules are color coded based on the percentage of edges in the averaged time  
927 course network. Dark blue modules have a high percentage of genes in the averaged  
928 time course network while light blue modules have a low percentage of genes in the  
929 averaged time course network.

930

931

932 **Table S1**

933 List of genes in each module

934

935 **Table S2**

936 GO enriched (corrected p-value<0.5) in each module

937

938 **Table S3**

939 Function of genes in modules 1, 43 and 71

940

941 **Table S4**

942 Number and percentage in the modules of targets for the TFs SPL7, GI, PIF4 and  
943 PRR5



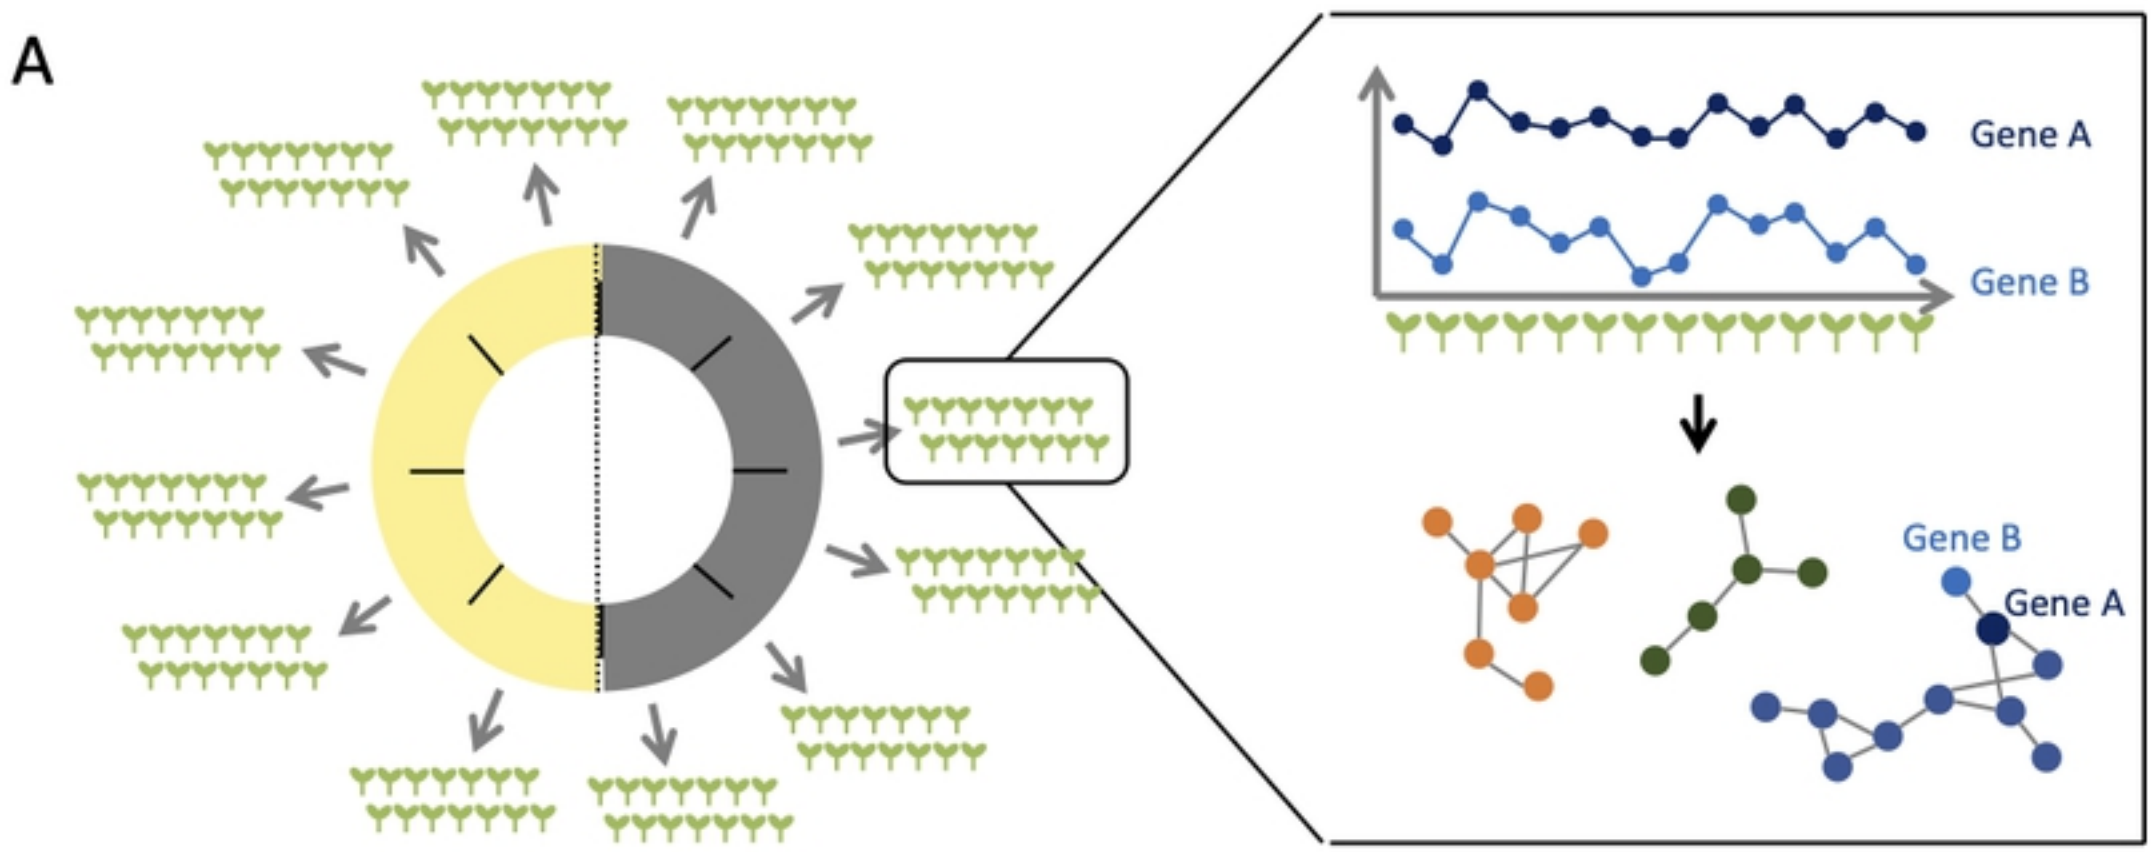

bioRxiv preprint doi: <https://doi.org/10.1101/2020.06.15.152314>; this version posted June 15, 2020. The copyright holder for this preprint (which was not certified by peer review) is the author/funder, who has granted bioRxiv a license to display the preprint in perpetuity. It is made available under aCC-BY 4.0 International license.

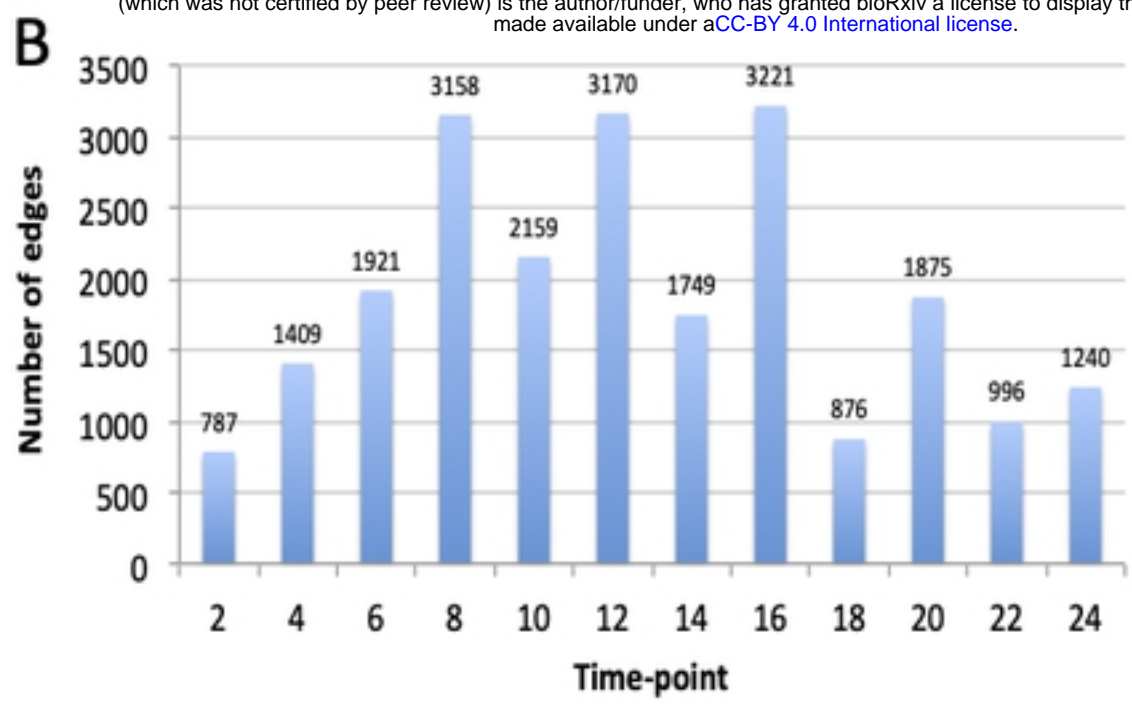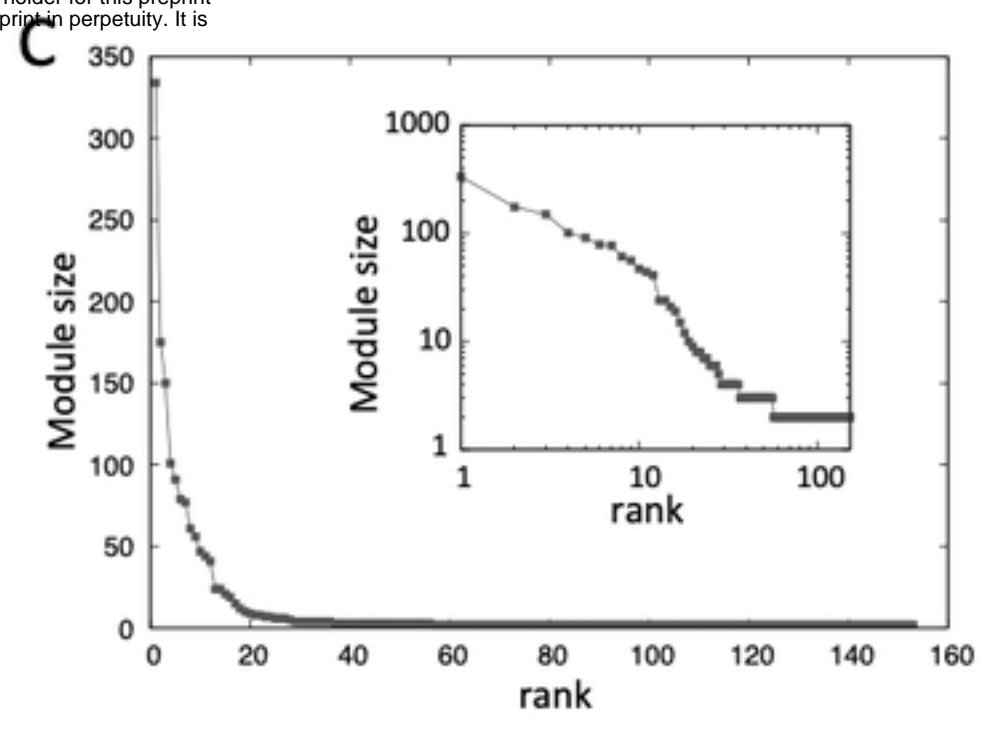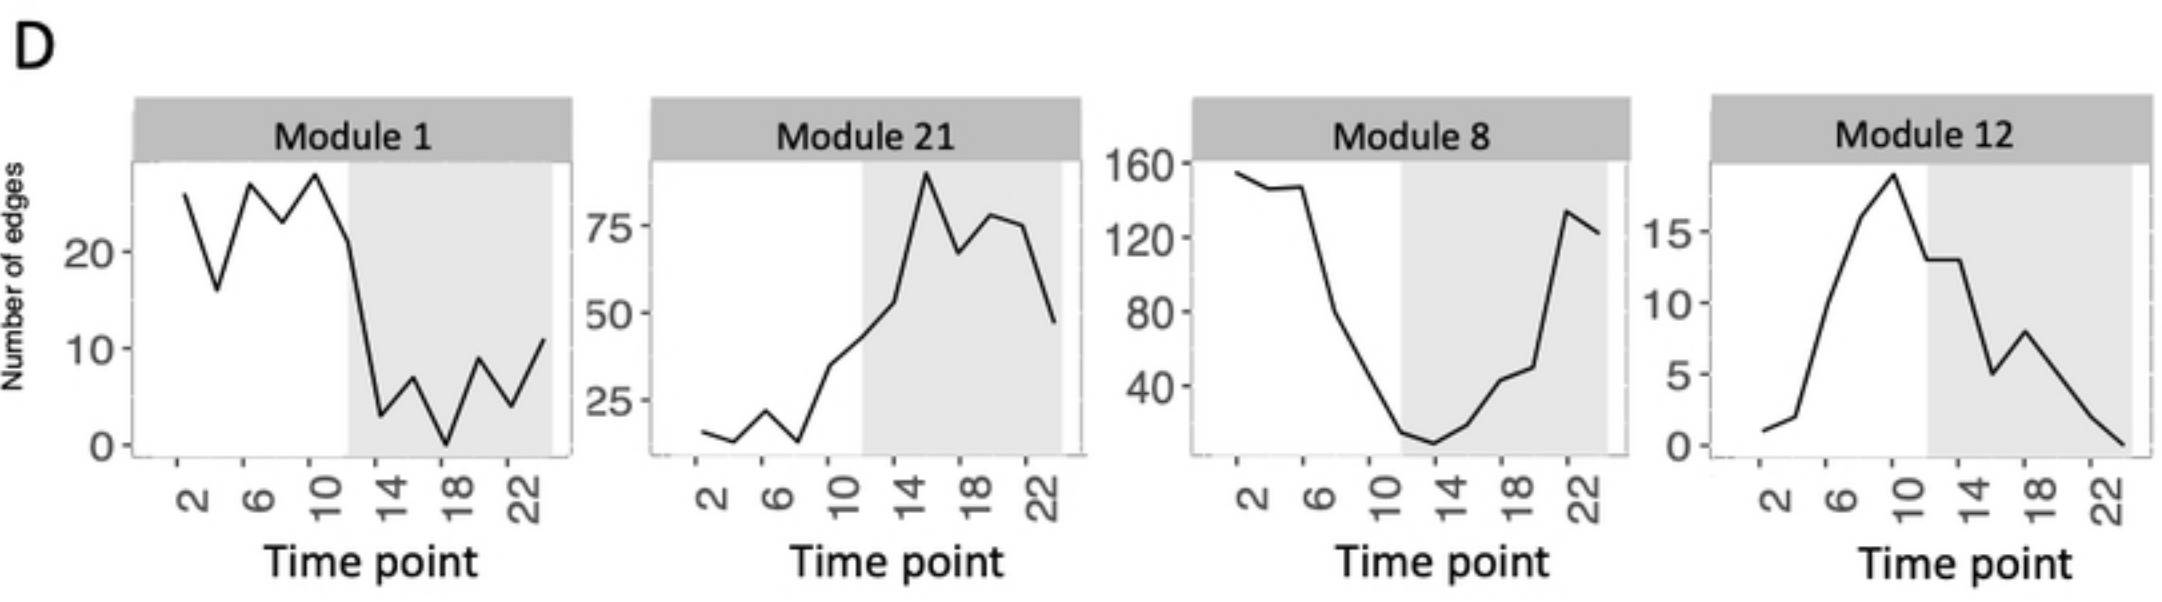

Fig1

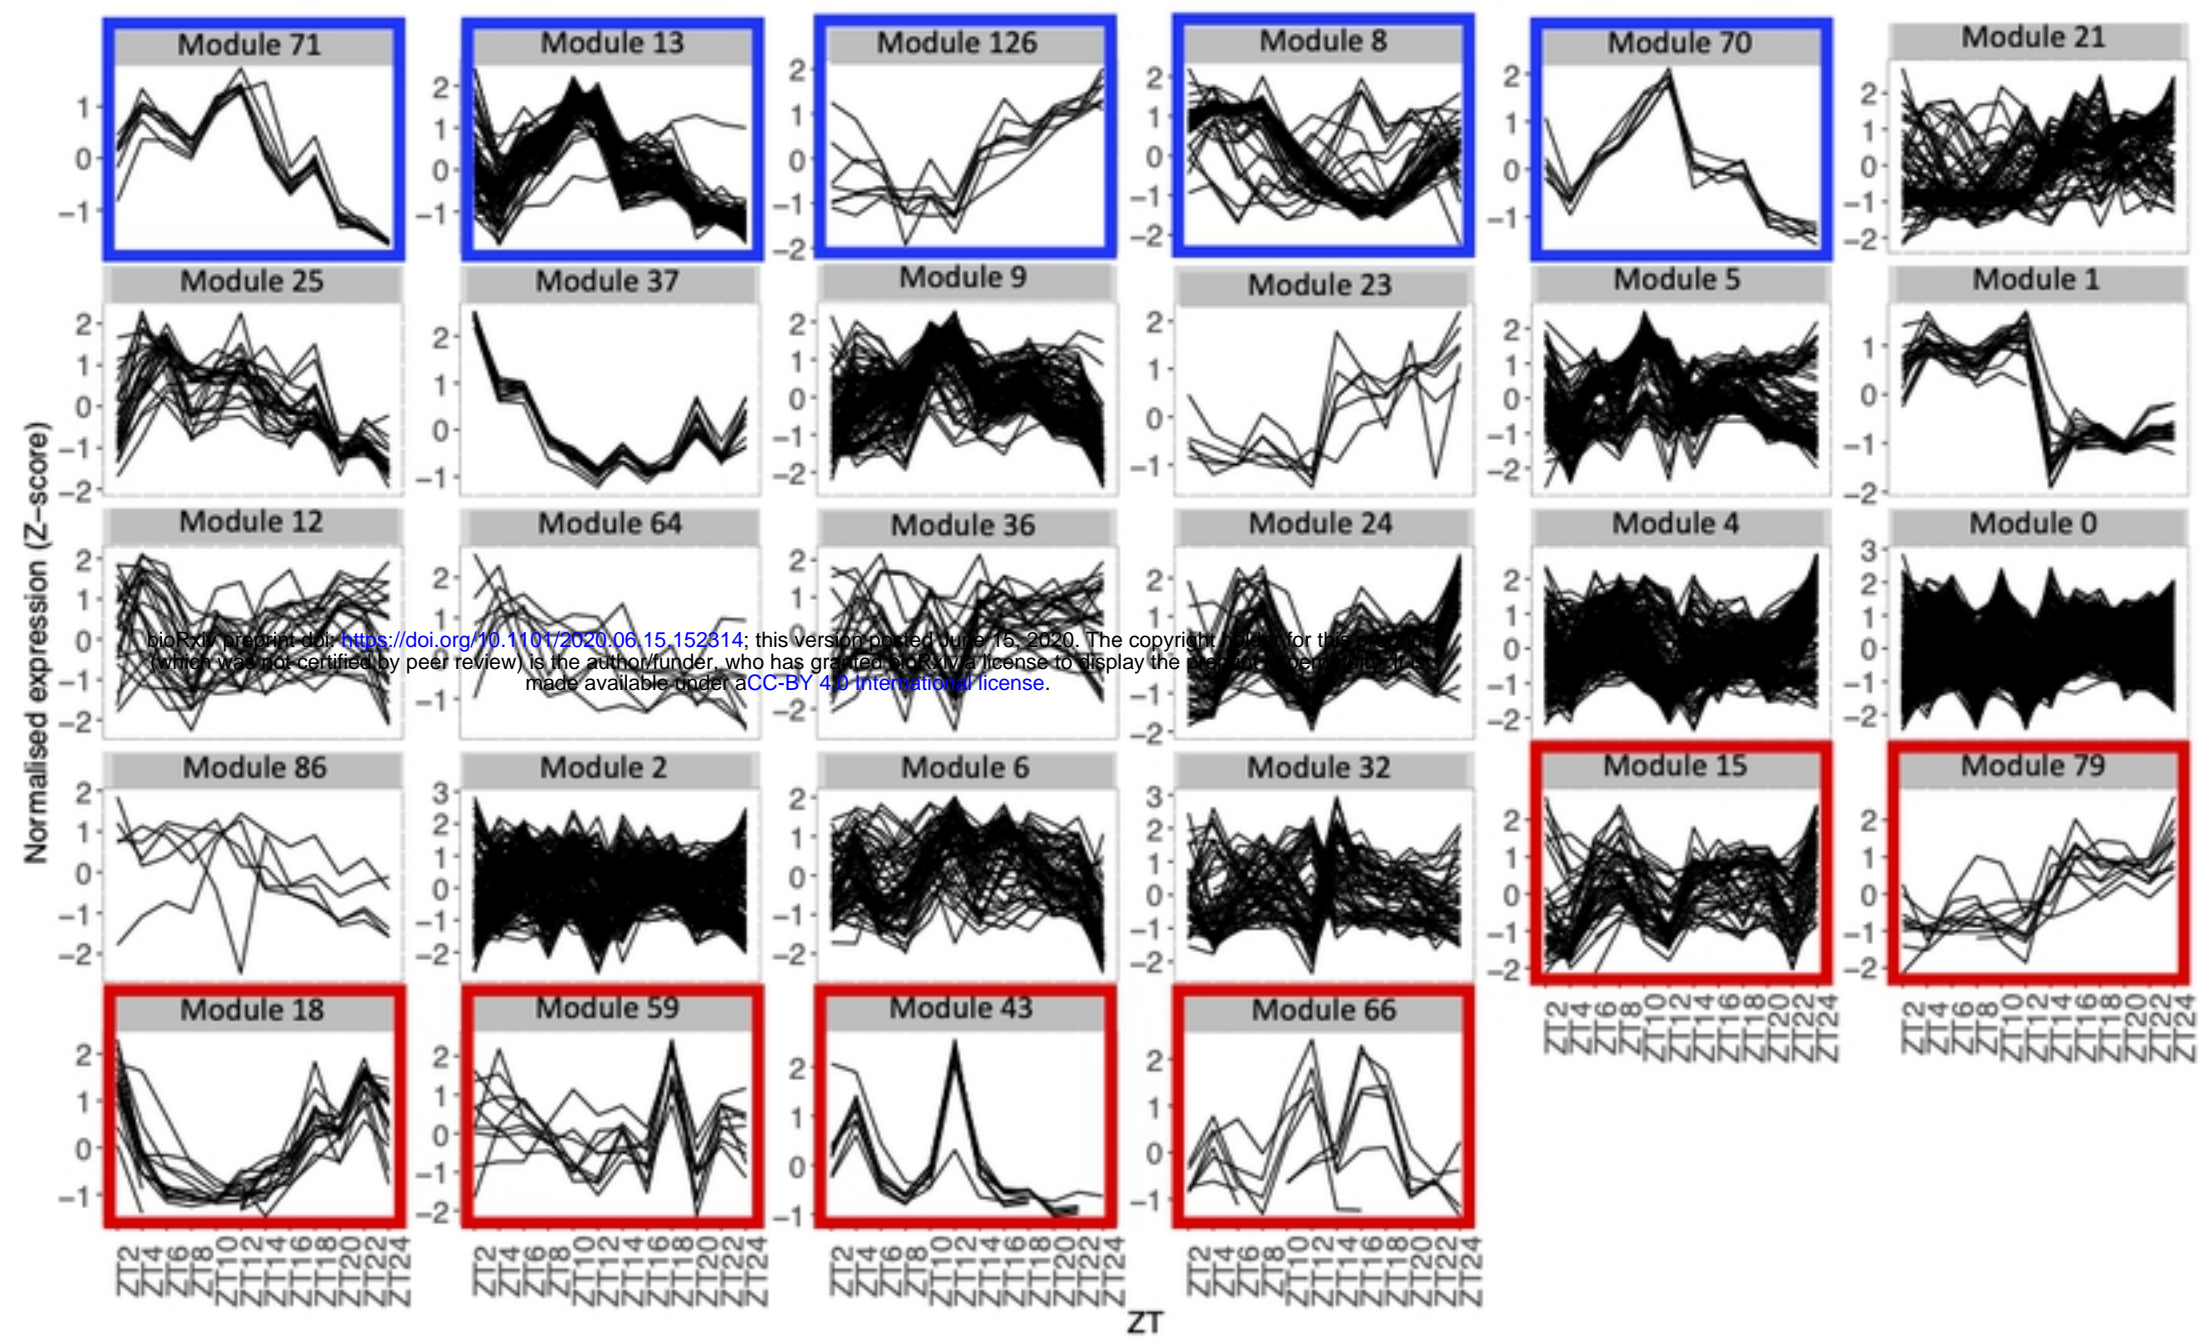

Fig2

A

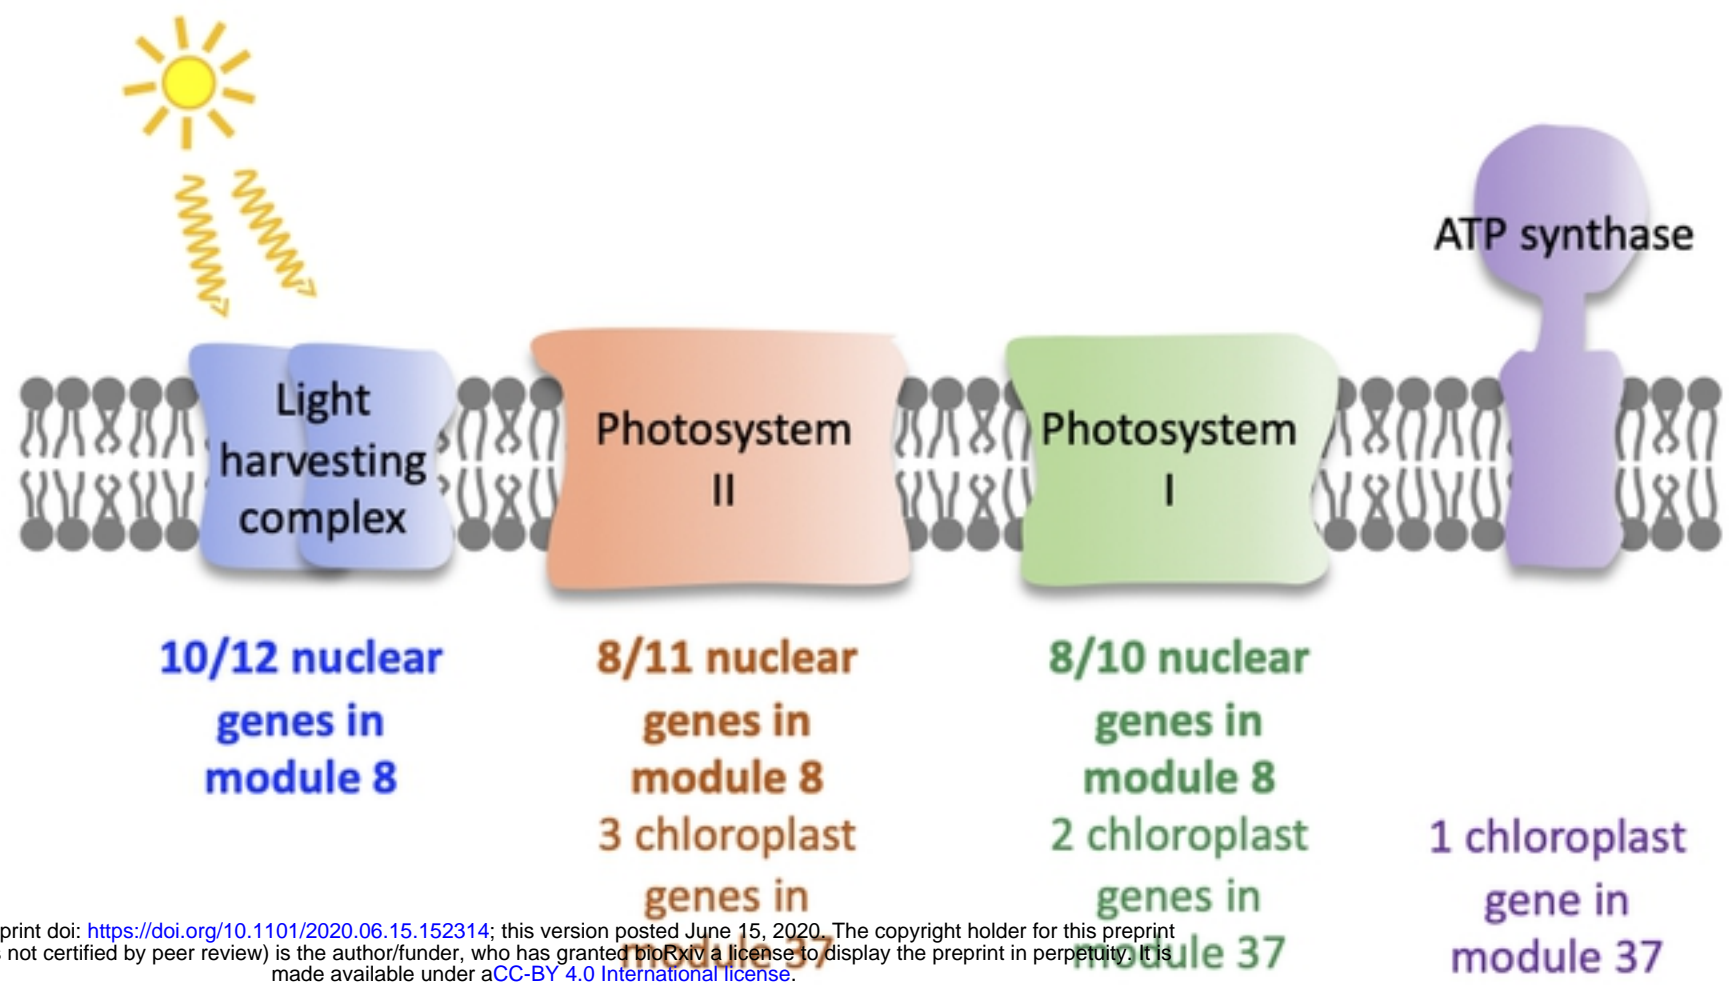

bioRxiv preprint doi: <https://doi.org/10.1101/2020.06.15.152314>; this version posted June 15, 2020. The copyright holder for this preprint (which was not certified by peer review) is the author/funder, who has granted bioRxiv a license to display the preprint in perpetuity. It is made available under aCC-BY 4.0 International license.

B

Module 1

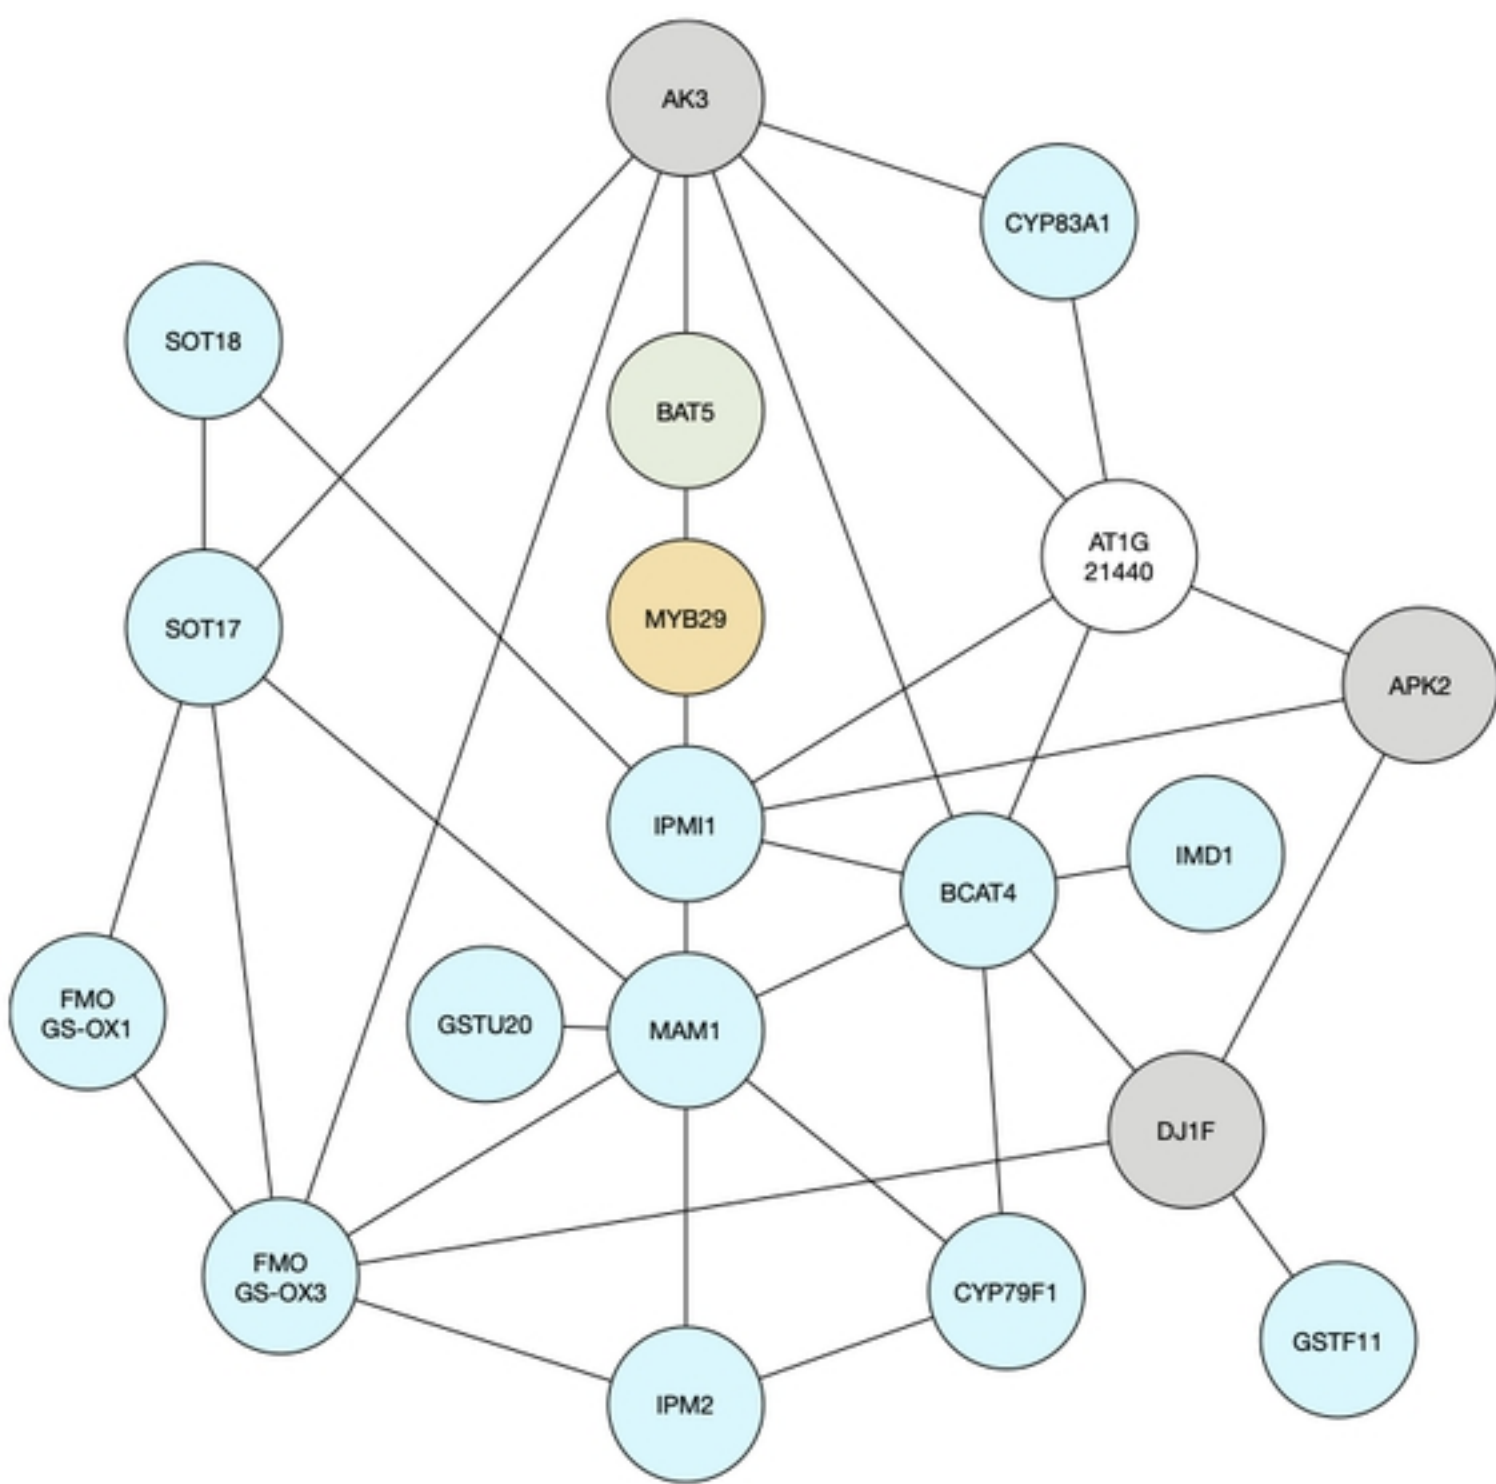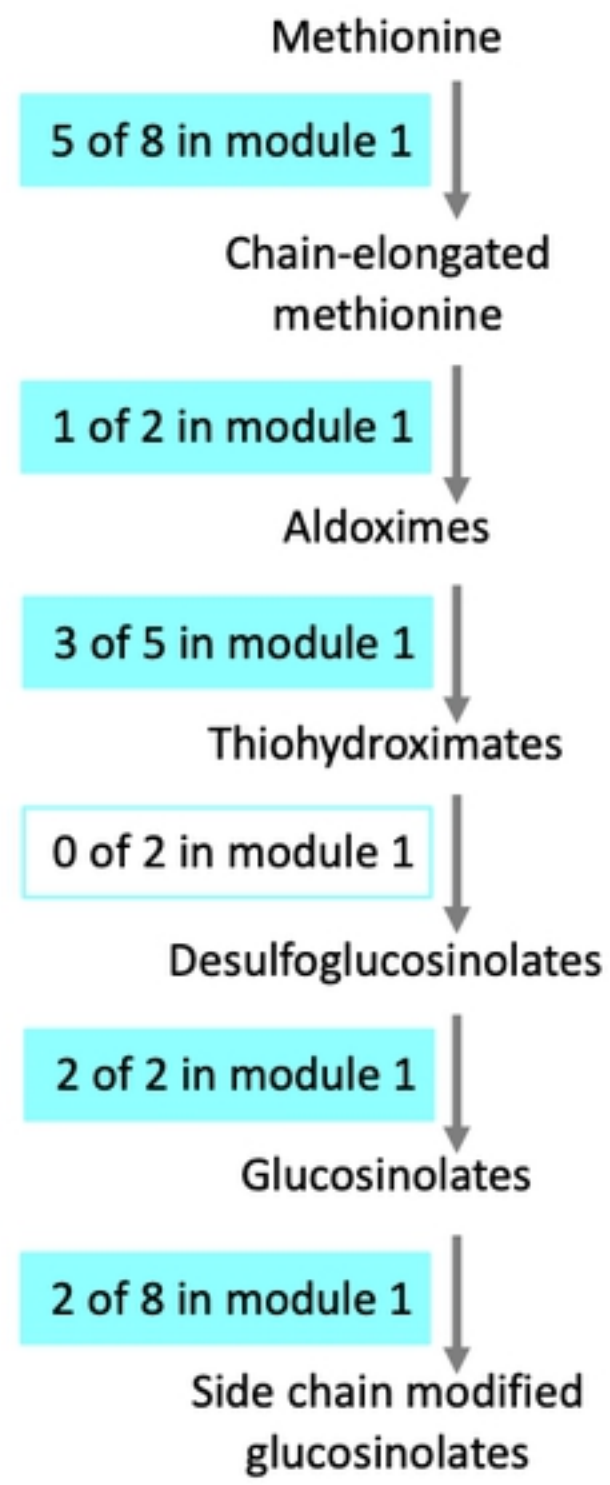

Fig3

A

Module 64 (7 genes)

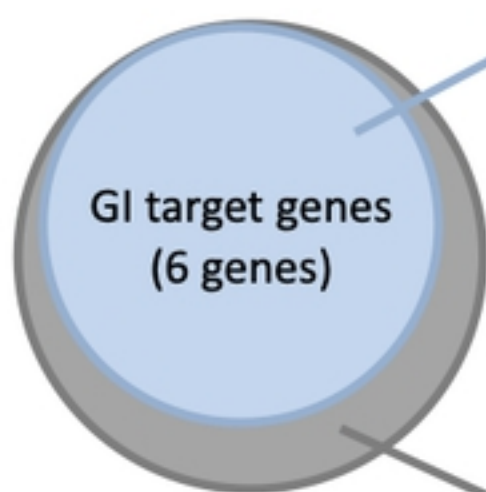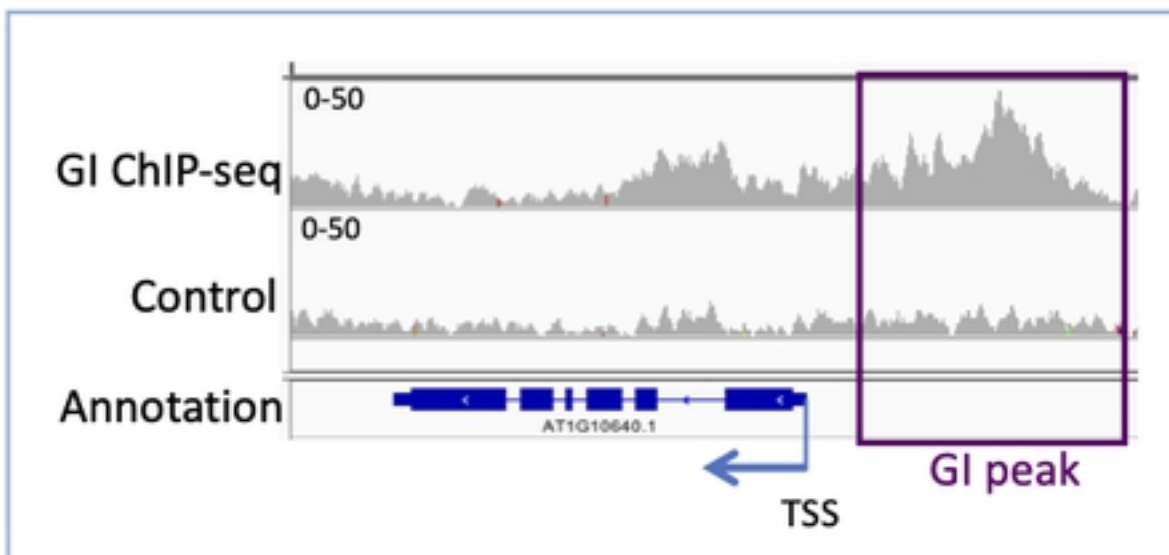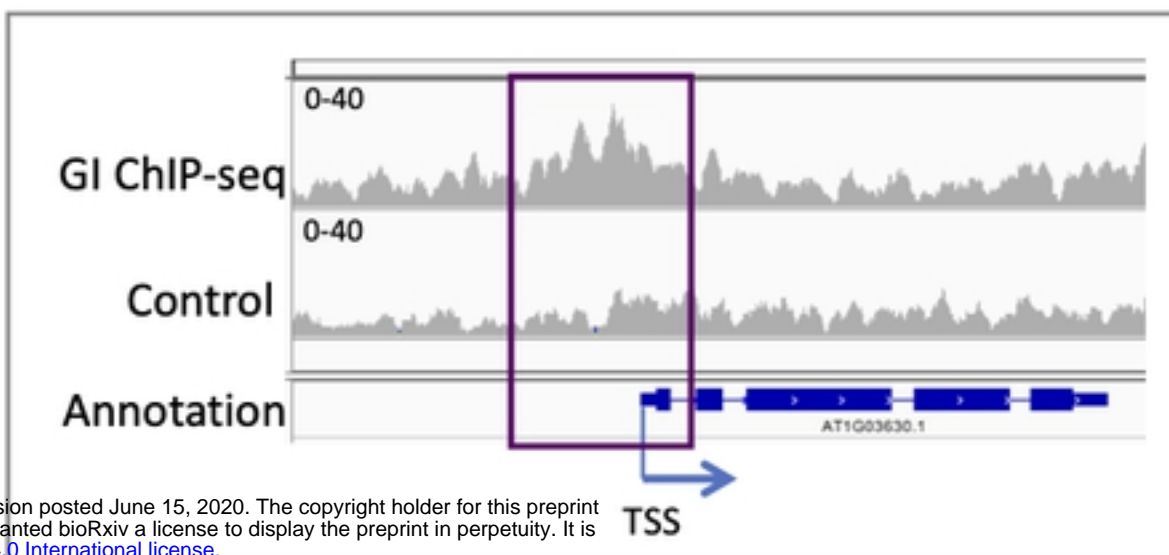

bioRxiv preprint doi: <https://doi.org/10.1101/2020.06.15.152314>; this version posted June 15, 2020. The copyright holder for this preprint (which was not certified by peer review) is the author/funder, who has granted bioRxiv a license to display the preprint in perpetuity. It is made available under aCC-BY 4.0 International license.

B

Module 86 (5 genes)

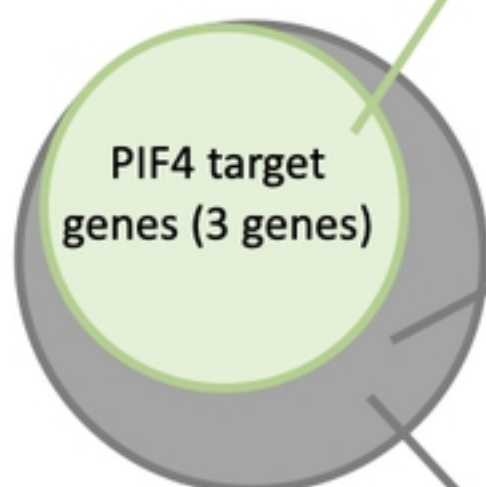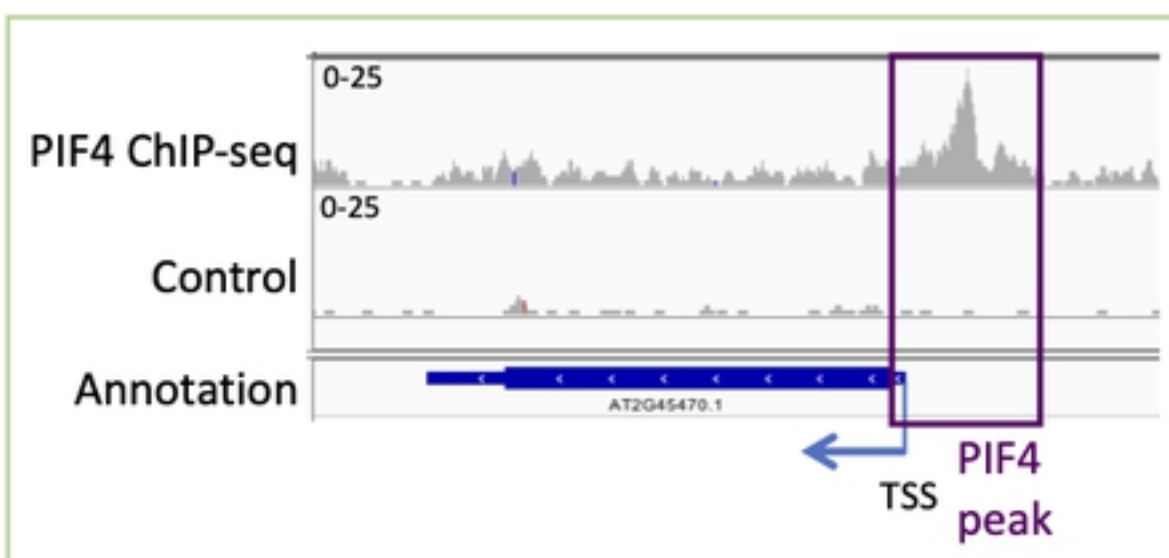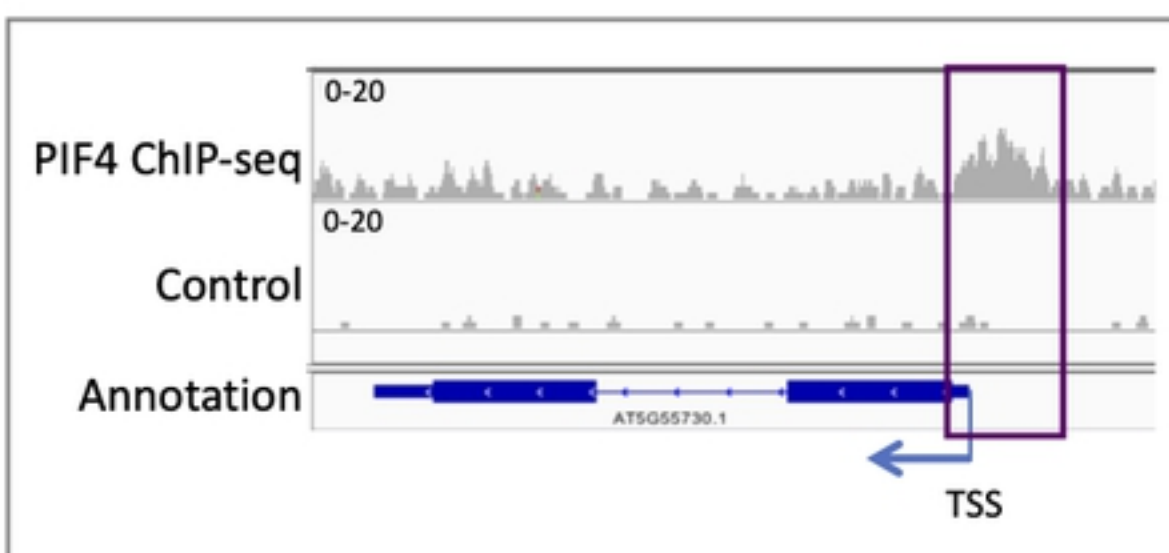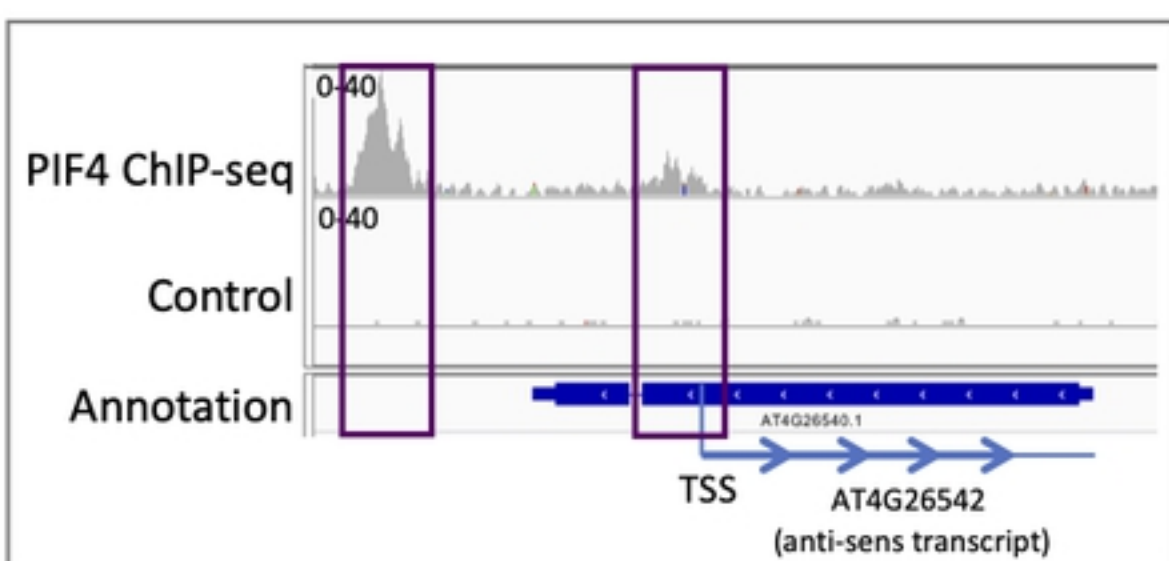

**A**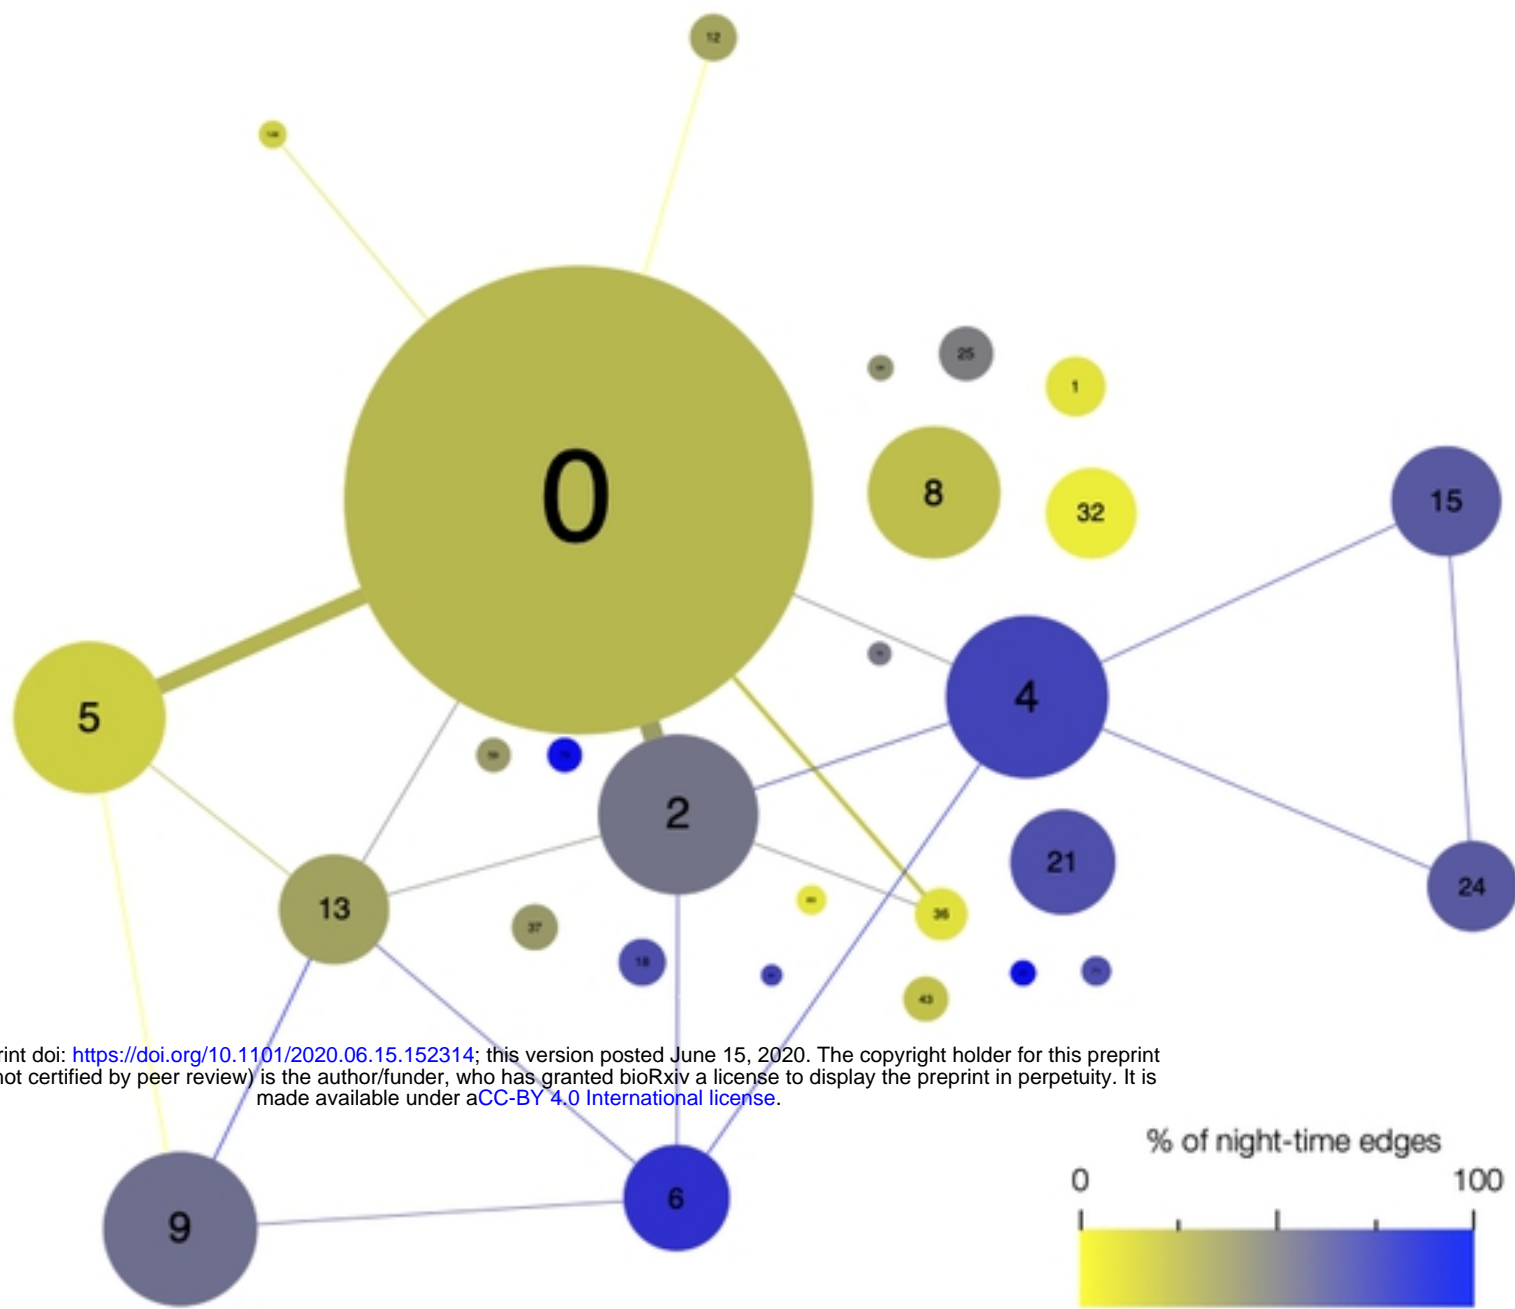**B**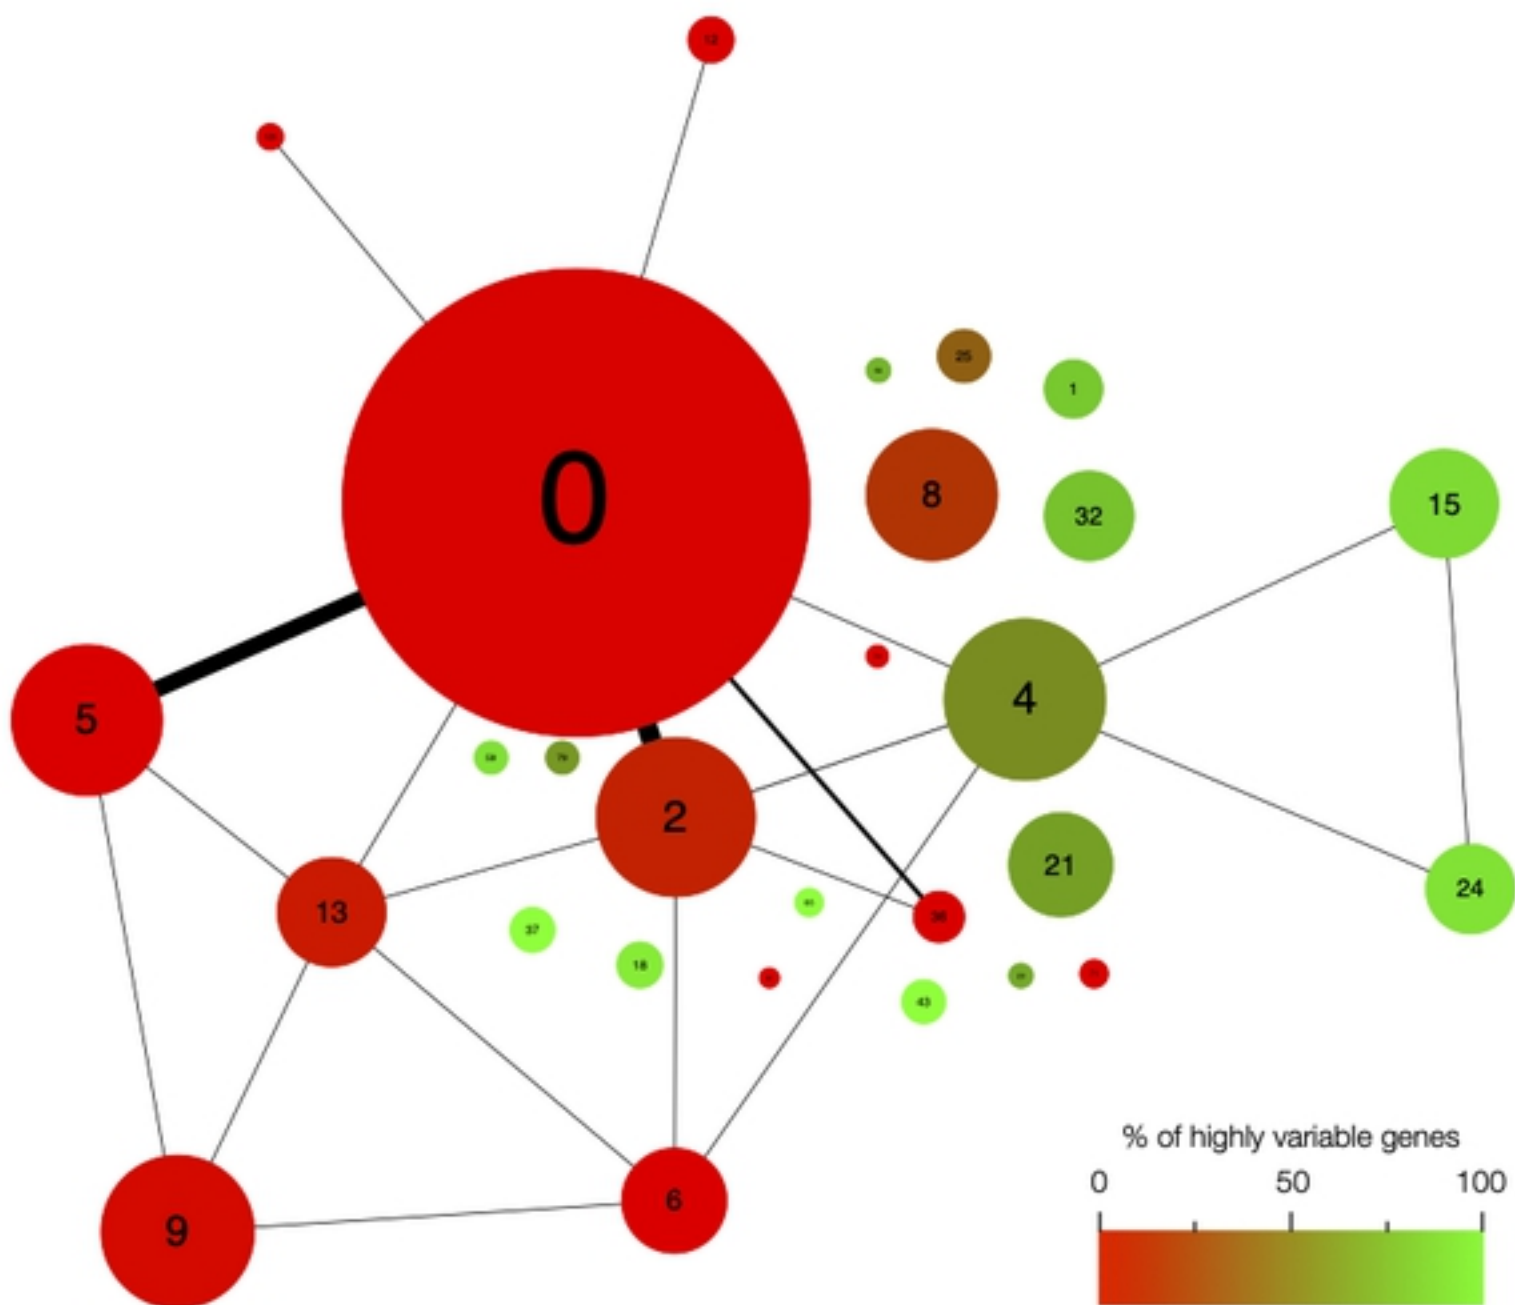

Source: https://www.biorxiv.org/content/biorxiv/early/2020/06/15/2020.06.15.152314.full.pdf
